# Supplementary material
Source: publisher figshare collection journal article supplement (https://gsajournals.figshare.com/ndownloader/files/13164815)
Supplement: Supplementary file 1 [file 13164815]

## Sheet: Table S2_Methow_RAD_sequences
Table S2. Polymorphic RAD loci detected in this study. Genomic location of each locus defined in columns 2 and 3.
RAD Tag ID	scaffold	start position	RAD Tag consensus sequence
51	scaffold_1002	178119	TGCAGGAAGATAGGGGAGGGAGAGGACTCATTCCCAGCAGCCACTCCCTCCTACCCTTGGGTCACCCGCCACCCCGGCTCCATGT
118	scaffold_1004	249873	TGCAGGTAAAGATGCCAGATGTGGAGGTCCTGGGTTGGCGTGGTTACACGTGGTGTGTGGTTGTGAGGCCGGTTGGACGTACTGA
168	scaffold_10063	7964	TGCAGGCTGACTTCAGTTGTCAGTTGAACGGTGTTTCCTCAGACACATTGGTGCAGTTGGCTTCCAGGTTAAGCGAGCAGACGTT
201	scaffold_10073	5763	TGCAGGCTTGGGAGAAGCCTTGGATCTCTCAGCCATTCCTGCGGAGTACCTGGAGTACCTGGTCTAAGAGGTCTTCAACAAGGAC
395	scaffold_10107	14686	TGCAGGTTGAGTTTGGAGGCCGGATGGAAGATCCATCGCCGTTGGTTACCACAGAGCTCGCGGGCACAGATCCGACACACCTCCT
668	scaffold_101	982858	TGCAGGATTGTCTGAGACCAACCACCCAGACAGCTGATGAAACAGGGTTTTCAGAACCGAAAAATGTCTGCACAGCTATCAGAAA
798	scaffold_1025	95050	TGCAGGCTTATCCTGACACGACCCTCCAGCATAACAATGCCACCAGCCATACTGCTCGTTCTGTGTGTGATTTCCTGCAACACAG
862	scaffold_1028	299303	TGCAGGTGAAGAAGCCAGATGTGGAGGTCCTGGGCTGACGTGGTTACACGTGGTCTACGGTTGTGAGGCTGGTTAGACGTACTGA
917	scaffold_102	1660657	TGCAGGAGAATCAGGATATCCCGTTTAGGGGTTCTCTCCCTGCCCTGGCCGTGGCACATTCTACAATATGACCAGTTAGGTTTTG
967	scaffold_10306	11480	TGCAGGATCTTCTGAGACCAGCCAACCGGACAGCTGATGAAACTGGGTTTGCACAACCTAAGAATTTCTGTACAAACTGTCAGAA
968	scaffold_10306	11484	TGCAGGTGAAGAAACTCGATGTGGAGGTCCTGGGCTGGCATGGTTTCACATTGTCTGCAGTTGGTGAGGCCGGTTGGACGTACTG
1029	scaffold_1032	151578	TGCAGGTCAGCATTTTGTGGAAGGTTGTGGTCAGGACTAATATTGAATATGCACTCAAGAATGAAAGAGGTTGGACCATCCTAGA
1101	scaffold_10350	2188	TGCAGGATGCTTATTTTCATAAACATTCGGCCAACACACAAGTTTCTCAGGCTTGCCTTTCAGGGAACAGCCTATGAATACCTCG
1240	scaffold_103	1465136	TGCAGGCTCATCCTGACATGACCCTCCAGCTTGACAATACCACCAGCCATACTGCTCATTCTGTGCGTGATATCCTGCAAAACAG
1278	scaffold_103	781306	TGCAGGTAACCAACCATGACATCAACACCTTGTATGGTATTTCCCTTAAAGAACACGTGTGATGATTGTCAATTAGATTAGATAT
1326	scaffold_1041	159229	TGCAGGCTGTGCGACGAACAGCTTTCATCCCAGAGTCACTACGACTTTGGCCTGCGAGCTCTCAAGAGCGTGCTGGTCAGCGCCG
1339	scaffold_1041	79421	TGCAGGAGCGCCTGCTTCGGGTGGGTGTTGTTATTGTGACCAGTGAGCTGAGATAAGGCGGGGCTTTACCTAACTTCCTCACTTG
1350	scaffold_10422	2855	TGCAGGTCGTTGGCTGCCAGACCTACTGAGTGGTAGAAAACAACCCAGAGTGTGAAAACACAATATGTTTCCTACATATTACTGC
1367	scaffold_1042	299228	TGCAGGAGCGAGTCACTGCTTTGATGGTTGCAGAGAACGACAGGGTGTTGTCCATGGTCACGCCAAGGTTCTTTGCACTGGGGAG
1531	scaffold_104	1023136	TGCAGGCAGTCCAAGAAAACCCAGAAAATGCCAGAGTCTATGGTGTTAGAAGTCCGTGCTACGTCTCTGAGATGACATATCTTTA
1542	scaffold_104	1272810	TGCAGGACAATGAACTGGAGAAAATTACCAGAAGATTCACCATTGAGCTGGCCAAAAAGGGTTTTATTGGTGAGCCGTGTCTGTG
1548	scaffold_104	1382030	TGCAGGTGGAGGGCTATGACAATGTGTACGCTGTTGGGGACTGTGCTAATGTTAACGAGCCTAAGATGGCGTACCATGCAGGTCT
1568	scaffold_104	214674	TGCAGGTAATTTGTAATAATTAACCTTAGGGACTGTGAACATCCTCCTGAACCCAGAGAGGTACCCTCAGCATCACACGAGAGGG
2068	scaffold_10661	14736	TGCAGGATGGCCTGATGCTGGACCAGGATATGTACAGCGCTCTGGTCAAGACACTGCAGAGAGACTGTCTGGTGAGGAAAACAAG
2126	scaffold_1067	101448	TGCAGGCAGAGGCCCGGAGGGCAAGATAAAGTTTCAGTGGCGACACCAGGCAGAGCTCAGACTGAGGCACACAGCCTAGCAGAAG
2262	scaffold_106	278606	TGCAGGCTCATCCTGACATGACCCTCCAGCATGACAATGCCACCAGCCATACTGGTTGTTTTGTTCTGAGTTTGTGAGCACATGG
2312	scaffold_10705	19746	TGCAGGTGCCTTTGTGGGGGCGTGACATCTCACAGCAATAAATGGCAAATCTGGTGCAGTCCATGAGATGCACTGCAGTACTTAA
2369	scaffold_1071	88900	TGCAGGATAGTTTGAGGCGGTGCTGAGAAGTATTTCTGTCTGTAATAAATTCCTTTAGTGGGTAAAAGCTCATTCTGATTGGCTG
2610	scaffold_107	707757	TGCAGGACACAAGCCATGACAAAACACAATGAGTGGCATTTCTGTTTTGTCCATGATATTTACAAAGAGCCAGATAAACACTGTG
2845	scaffold_1088	225928	TGCAGGTACACACCCCAACTGTCTCACCAACCTACACTACTGGTAAAAAGCTTTGGAACACCTACTCATTCAAGGGTTTTTATTT
2850	scaffold_1088	311748	TGCAGGATCGTCTGAGACCAGCCACCAGGATAGCTGATGAAACTGTGGGTTTGCACAACCAAAGAATTTCTTCACAAACTGTCAG
3011	scaffold_10959	15258	TGCAGGTAAACAAGGTGGCAGGGAGACTGGGCCATCCACATGGCAACTCTAATGAGAATAAGGAAATCATTCATTTAGGGGTAGA
3012	scaffold_10959	15262	TGCAGGATTCCAAAACAAACACCAGGCATCAAACATCCATCACAGAGATATGGACACAAGCCCCAGACATGACCCATCAAACACT
3029	scaffold_1096	172972	TGCAGGTTTTGATCAGAATGTTGGTCTTTTGATTCTTTCACATCGCCTTTCAATGATCTTATGGTACGTCCTCTATAGGACTTTC
3052	scaffold_1097	39481	TGCAGGTGAAGAAGTTGGATGTGGAGGCCCTGGGCTGGTGTGGTTACATGTGGTCTGCTGTTGTGAGGCTGGTTGGATGTACTGC
3516	scaffold_11095	16780	TGCAGGGTGATAGCTGGGATGGGGGAATCAGTGAGCTCCTTGGTCTAATCATCAGCTTCAACTAAAAATCACAGGTCTCTAACGA
3648	scaffold_1110	7525	TGCAGGTATAAGGTGTTCGTCGGAACTCGCATTGCGGAAATCCAAGACCTGTGACGACCCTCCCACTCTGTCTGCCGTATTCTCT
3726	scaffold_11142	3388	TGCAGGTAAGCGGGGAGAGAGAGTCTGTCGGGGGTCTCTGCACTTGCATGTCCTTGAAGTACCCCTGCGGTGAGTGTGTGTGAGC
3869	scaffold_1119	289598	TGCAGGTCCAGCTGGGTAAACTTCTCCTGCTGGAACTCTTTGTACTTGGTCAGCTTGCCTTGTTTCCCGGGAGAAAAATCACAAC
4156	scaffold_112	1412461	TGCAGGCCAAATTCGTCCCACTGGCTACGAGTTGGGGAAAAGGGCTCTAAAGTCACAAAGTCATTGTATTGCCATGTTGAGGCTA
4220	scaffold_11301	10537	TGCAGGGCCTGATTGTGAAAACTGTGGCGGATTTGTGCTCTAATCACAGTGCAGCCGATACTCTCCCCAGGCTCCCCGAAAGTCT
4259	scaffold_1131	116383	TGCAGGGAGAAACTTTGTGGCAGGCCATGGGAAAAAGAGGGGGGAGCATCAGGGATAGTCACATTAGGATGGAAGATGAGGAAAT
4458	scaffold_1139	60479	TGCAGGACTGTAGCTCTCCAGGAACAGGGTTGGAGATTCCTGCCTTAGATAGTAAACTGACATGGTCAAACATATTGATGCAACG
4472	scaffold_113	1270475	TGCAGGCTGGAGCTGGGGGGATGAGTGGACCGTAGATGAAAACAGGGCTGTGGATGAGAAAGGTCTGCTCTCACACTGATCTCTA
4496	scaffold_113	262301	TGCAGGCTTTCTCTGATCTAAGGATTTCAGGGCTTTATGTACTTCTTGCACTGAGAATGACAAAAAGCTACATGTTTGACCAGCT
4611	scaffold_1143	248292	TGCAGGACAAAGCAGAGTTCAATGTGGTGGCCTTCACAGAGCCATGGGAGCTAGATGTGCAGACTCAGCTTTGGAGGAAGGGTCT
4646	scaffold_1144	76476	TGCAGGGTGCTGAGGGAGGAAAGGAGACATCTTTTCAATGAAACGCCCATTTCTACTACTGTGCATCATGACCATCAACTGGTAT
4739	scaffold_1148	256511	TGCAGGCTCATCCTGACATGACCCTCCAGCATGAAAATGCCGCCAGCCATACTGCTCGTTCTGTGCACGATTTCCTGCAAGACAG
4757	scaffold_1149	11186	TGCAGGCATTCTGACACAATGATGAATTGTGTCAGAACGTTGATACTCAACAATGTTTGCCAGTACACACAGTTCGAGAGAGAGA
4809	scaffold_114	78110	TGCAGGAACTGGAAATGTAGATTATTATTAATGGACATTTTTGTAAGGAGTCATTTGATACATTTTAGGTGGAAATCACAAACTT
4841	scaffold_1150	237080	TGCAGGTCCAGGCAAGATGAAATGGGAGTGAAATAGCCTCCCGTAACATCACATTCTTGCAGATTAGGTAGCTGACCATCTCAAT
5024	scaffold_1158	304913	TGCAGGTATGATGACAGATAGGGCTGTGGCCGAGGCTGACTTGATAACCTTGTTGCCAGGCCGTGAGTTCCTCTTCTCCCCTGTG
5026	scaffold_1158	310806	TGCAGGCATCCGGCCTGCCACAAGGAGGTGCTACAGCACGATGAGCCAAGTAAAGCACCCCTAGCCAAACCCTCCCCTAACCTGG
5030	scaffold_1158	51721	TGCAGGAGCGGGTCGCTGCTTTGATGTTTTCAGAGAACTACAGGATGTTGTCCAGGGTCACGCCAAGGTTCTTTGCGCTCTGGGA
5041	scaffold_11593	14062	TGCAGGCTGACTACCTGTTACGCGAGGGCAGCAAGAAGCCAAGGTAAGATGCTAGCTAGCATTAAACTTATAAAAAACAATCAAA
5253	scaffold_11657	1979	TGCAGGATTTGCTTTTTGGAATGTGGTGTCAAAAAAGCAGAGCATCTCTTTATTACGGACATACCGCTCCCCATATTTACAACCA
5587	scaffold_1176	35681	TGCAGGTGGATTTGTTTCATATAGTATGATTGCTGACAAAACGTGACCTCACTGCAGAGATGTGACAATTGCTAAATGTAAATAA
5669	scaffold_117	1131931	TGCAGGTCAGAGAGAGCGGTAACACAATCATTAGACCCCAAACAACACCTTCCAAACCAAGAACAGACAACTAAACAGTGATTAT
5697	scaffold_117	202754	TGCAGGTGCAGCTGAAAAGCGATGAGATCAAAACTTTTGCGATGAAGATCCTGAAGAAGAGGCACATCGTGGACACTCGGCAACA
5704	scaffold_117	396642	TGCAGGTGCCTTTTGATGTTGTTGCACAGTTGTACATTGTTAGACTGAAAACACTGGTGTAGTTCAGCCACTTTTGATGGTGAGA
5766	scaffold_1180	305535	TGCAGGTATTTTGCTCTCTGTGACAAAGTACCATACCAGAGTTGGCCTCATTCCAAGGTGTTAGAATGGGATTTAAGCAGTCATA
5811	scaffold_1182	98915	TGCAGGCTCATCCTGACATGACCCTCCAGCATGACAATGCCACCATCTGACAATACTGCTCATCCTGTGCTTGATTTCCTGCAAG
5888	scaffold_1187	213802	TGCAGGCTCATTCTGACATGACCCTCCACCATGACACGGCCTCCAGCCATACTGCTCGTTCTGTGCGTGATTTCCTGCAAGACAG
5922	scaffold_11890	6487	TGCAGGAAATAAAGATAAGCACAGAAAAAGGAAAAGTCAATAGTGTTTTATAAATGGGACAGAAAATCATTGATTTTGGTACAGG
5928	scaffold_11897	14371	TGCAGGTAATGGGAAGGAATCCAGCTGGCCACAAGTTGTGCTGCTCCTATCAGCCCTCTCTCTCTCTGCAGTTAGGCTGACTGTC
5929	scaffold_11897	14375	TGCAGGTAGAGAATCTGTGGGAAATGAATCCTTTTTAGTAACAAAAAGACGGAGGACATGTCCCCTGGCAAGGCCCATCCAAACC
6127	scaffold_11925	17840	TGCAGGCACTCCAGAGGAAAATGACCGCCCTGAAAGAAGGAGAAAACACATTTTTCATGTTGAGCTATTCAGTTAAACATAGTTG
6147	scaffold_1193	175735	TGCAGGCTCATCCTGACATGACCCTCCAGCATGGTAATGCCACCAGCTATACTGCTCGTTCTGTGCGTGATTTTCTGCAAGACAG
6265	scaffold_11992	217	TGCAGGACGTTTGGCATTTGCCAGAGAACACCAAGATTGGCAAATTCGCCACTGGCACCCAGTCATCACAGATGAAAGCAGGTTC
6345	scaffold_119	472643	TGCAGGACCTCAGCAACCTGCAAGAGCTCTACATCAACCATAACCAGATCAACATTATCTCCCCCAATGCCCTCTCTGGCCTGCA
6355	scaffold_119	726212	TGCAGGTATATTTCAATAGACATCCCCAAAGCCAACACCTTCTTTGGCTGCCTTTCCTTCCAGTTGTCTGCTGCCAATGATTGGA
6361	scaffold_119	746137	TGCAGGAGCACGTGCTACGGGTGGGTGTTGCTATGATGACTTGTGAGCTGAGATAAGGCAGAGCTTTACCTAGCAAAGACTTATA
6409	scaffold_11	1706371	TGCAGGTCAATGTAGCCGTCATCATCATTGGCTAGTTTGGAGTACCTGACCTTAGTGTTAAGTATTCCTTGTCTTAAACTGCTGC
6581	scaffold_1202	262623	TGCAGGTGTGATGTTCGGATGTACCGATCCTGTGCAGGTGTTACACGTGGTCTGCCACTGTCCGTCCTGTCTCCCTGTAGTGCTG
6604	scaffold_1203	81615	TGCAGGCAGCCTTGTTGCTGCAGCACAGAATACAGTGAATCAGAATGACTCATTTCAATTCTGCTACAATGTCCTTTGATAAATA
6964	scaffold_1215	277287	TGCAGGTGGCGCTGGTGGATCTTTCGGCCAATACTGCCAATGGTGGCACGAGCTCGGGGATCCTGCTTCTTCTTAGGCACCTGCC
6965	scaffold_1215	283004	TGCAGGTTGAAAGGCGCACCCCTCCCTGGGACAGATAAACACCGGGCGCTCCCCTGCGTGGACACACTAGCGCTGCTTCAGGAAC
6971	scaffold_12160	10263	TGCAGGTTCTTGCTCTACAACATAGAGTACGACCCTACCTCAAACAGGAAGCGCTGCAGGTTCTAATCCAGGCACTTGTCCTCTC
7166	scaffold_1223	194377	TGCAGGTATTTGTTGTCCAGAGTTGTTATGACTGTGATGATGAGCCATCATTCTCAGACGCCTTTAACTCATTAATAGTCCTTGT
7169	scaffold_1223	43342	TGCAGGATCATCTGACACCGGCCACCCGGACAGCTGATGAAAGTATGGGTTTGCACAAACAAAGAATATCTGCACAAACTGTCAG
7195	scaffold_1224	173322	TGCAGGATTGTCTGAGACCAGCTACCCGGACAGCTGATGAATACGAAGAGTATTTCTGTTTGTAATAAAGCCCTTTTGTGGGTGT
7251	scaffold_1226	86939	TGCAGGATAGTCTGAGACTCGCCACCTGGACAGCTGATGGAACTATGGGTTTGTACAACCAAAAGAATTTCTGCAAAAACAGTCA
7255	scaffold_12272	4294	TGCAGGACGTCAGCAGCACAGCCCAGGGCAGCCATCTTGTAGACCAGGTTGTCTTTACGACACTCCTTCAACACCAGATCAATCA
7319	scaffold_1229	152221	TGCAGGTCAAAGTAACTCCATATTCCCACAAATAGTGATGGTTAATCGTGATGCCTTAAAGGTATACAGTGCCTTGCGAAAGTAT
7443	scaffold_1232	93387	TGCAGGTCAGAACGACCTGACTTGGTCAACACTGCATCCACCACCAAAGTCTAAATCTGATGTCCTTGGTAAGTAGGACAGACAT
7499	scaffold_1236	186822	TGCAGGTTCATGCTCTACAGCATCCATAGAGTACGACCCTGCCTCACACAGGAAGCGATGCAGATCCAAATCCAGGCACTTGTCA
7505	scaffold_1237	103955	TGCAGGTGAGAGACTTCTGCTATTCTCTCAAGTAGCCCACACACACAGTGCAGGATAGATCGCATCTAACATTAGAATAATTTAC
7619	scaffold_12407	15604	TGCAGGTGAAGAAACCGGAAATGGTCCTGTGCTGGCGTGGATACATGTGGTCTGCGGTTGTGAGGCTTACTGCCAAATTCTCTAA
7655	scaffold_1242	255909	TGCAGGTGGCCTGAACCAGAGCGGTCAGGTAGGACTCTGGGACCTGCAACCCAGATAACCACATCCCATTGGGCCTCCACTTCAT
7714	scaffold_1246	13955	TGCAGGTACCATGTTCATCTGTACAAACAATTGTACGCAAGTAGAAACCCCATGTGACCATGCAGCCATCATACCGCTCAGGAAG
7805	scaffold_124	1529216	TGCAGGATCTCCTTCCTGGGTTACAGGGCAAAAGTCAGAGGTCAGGGCCGTATTATTCCATCCTGGTCTGGGGACCCACTGGGTG
7889	scaffold_1251	222236	TGCAGGACAACCTGGGGAAGGGGAACTCTCACTTAGGGGTAAGAAGATTACTTTTTACAGTAAACCCTCCTTCGACACGATTAAC
8091	scaffold_12615	9708	TGCAGGCTGTGTCGACCACACCCACCTCCGTCACCCTCAGCTGGGACACTCCCCTCACTGGTAACGGAGACGTCCTCACCTACAA
8207	scaffold_12687	636	TGCAGGTCGGAGACCGTTGTGGAGAGGATGCTGTGTAATTGGATGTCCATCTGTCTTTACCAGTTCCTCAAGGTGATGACATGAC
8525	scaffold_12811	15247	TGCAGGCATCTGTGTGGCAGAACCACATGAGTTCCGTGTGTTTAAGAAGGTTTTTGTCTCTCTGAGGCTGCCGTACTCAGTCAAA
8745	scaffold_128	44106	TGCAGGATTGTCTGAGACCAGCCACCCAAACAGTCGATGGAAATTGTGAGTAGTTCTGTCTGTAATAAAGCCCTTTTGTGGGGAA
8832	scaffold_12928	13486	TGCAGGTTGCCTCAGTATTTTATAGTCCCAACAAACGTCTCGGACGAAGACTTGACTAAGTACCAGGGAAAGGGATTACCGGTAT
8953	scaffold_1298	210106	TGCAGGTTGACTCTGGTCATCAGTTGAACAGTGTTTTCTCTGACACATTGGTGCAGCTGGCTTCCAGGTTAAGTGGGCGTCGTGA
9103	scaffold_12	2092214	TGCAGGTCATAGAACTCCAGGTTGCTGACGAACCAGCCGTAATTCAGCCCGGCCGGGGCGCTCTTCAGCTCCTCCTGGATCCAGG
9281	scaffold_1304	49112	TGCAGGTGTGATGTTCGGATGTACCGATCCTGTGCAAGTGGTCTGCCACTGCGAAGATGACCAGCTGTCCGTCCTGTCTCCCTGG
9318	scaffold_1306	45550	TGCAGGTGAAGAAGCCAGATGTGGAAGTCCTGGGCTGGCGTGGTTACACGTAGTCTGTGAGGCCCAGTTGGACGTACTGTCAAGT
9319	scaffold_1306	45554	TGCAGGATCGTTTGAGACCAGCCACCCGGACAGCTGATGAAACTGAGGAGTATTTAGTGGCAATTACATATTTGAAGAAATCCAT
9362	scaffold_1309	225931	TGCAGGTGGCAGCATCACCTCAAGGGGAAATGTATTGGTTTGGTGGTGATATCTGCTGTTCTCTTATTCAACAGAACAGTAGATA
9473	scaffold_1311	146023	TGCAGGATGTGGACTGCAGTGTGAGAGGCTCGACTCATTGGAGACTGTTCCAGACTACTTTCAAGGTGTGGTGGTCTTTTCTGGC
9593	scaffold_13168	2723	TGCAGGATGTTTTGCAGAGAACGACAGGGCAACGCCAATGTTCTTTGATGTCTGAGATGGGGACACCATGGAGTTGTTCACCATG
9595	scaffold_1316	112442	TGCAGGTTCTCTCCATCACCCTCATGTATAGAATGTATCCACACAGGCCACTGTGATAACTGAAAAGTGCATCAACTGTGTTGTC
9783	scaffold_1322	39322	TGCAGGTCTAAAGACTGTTTGTGTTCAGTTGGTTGCATGGCCGCATCATTCCAACGACTGACGGAGGCATCGAGCAGGAAACAGA
10081	scaffold_13338	6888	TGCAGGATTTTGAATGCTTCTTTTTATCAATCTGTTATATTTTGATGTGTTTTTCTATTGTGTTGTTGATCCAGGTTGATCCGTG
10162	scaffold_1338	28585	TGCAGGGACTGGGTCTGCATATGCTGCAAACACACACACACAAGGCACACATACGACACTCACAGTACACACACACACAGTCCCT
10175	scaffold_13396	12704	TGCAGGTGAAGAAGCCAGATGTGGAGATCCTGGGCTGGCGTGTTTGCACTGAGGTTGTGAGGCCGGTTAGACGTACTGTCAAATT
10223	scaffold_133	847004	TGCAGGTTCTGGAGAGGTCGGAAAACACACAATGATCTCTGACCTTCTGGTTTCCTGTTAGGCAATCCGAGCTCAGATTTCCATC
10262	scaffold_1341	92193	TGCAGGTTGCGTGTCTGGTAATGTGACAGTGTGTCGGTGTACAATTCAAAGATGTTTGTGTGTGTATGTGATAGATATTGTGCTG
10346	scaffold_1345	212909	TGCAGGCAAGAGGAAAGACAGGCTCTGTAGCCACAGTCCATTGTGTGGAGCGGTGGGTAGTCCTGAAGAGACAATACTCATCACA
10352	scaffold_1345	72302	TGCAGGTGTGACATTCGGATGTACCGATCCTGTGCAAGTGTTGTTACACGTGGTCTGCCACTGCGAGGACAATCAGTTGTCCGTC
10436	scaffold_134	1321731	TGCAGGTTGCCTGGTGGCTGAGTCCTGTGACAGCTTGATGTATTGATATCCAGCTCACCGAGAAACCATCATCACCACTGGCCTG
10704	scaffold_135	509251	TGCAGGTTCATCCGCAGAGGACGACCTTTCCTCACACAGAAGCAGCGCGGGTCCGAATCCAGGCACTCGTCATATCAGGTCTTGC
10787	scaffold_1362	11604	TGCAGGTCCTTGATGCAAAGCAATGGGGACGGCCTTAGCATTTGAAAAGTAGAAGTCATTATTTTTCGGGGCACATTAAACCCTC
10883	scaffold_13679	9969	TGCAGGAGTTCAGTGGTTCCTCCCCAAAGAGGAGGCGTGGGGCGGAGGAGAAGGATGAAGGGATCGGCTCCCCAGACATTCTGGA
10911	scaffold_1369	179383	TGCAGGATTGTCTGAAACCAGCCACCCGGACAGCTGATTCAACTGAAGAGTATTTCAATCTGTAATAAAGCCTTTATGTGGGGAA
11001	scaffold_1372	166465	TGCAGGTTTTCACTCCAACCCTGTTCCTGGAGAACTGCCTTCCTGTAGGTATTCACTCCAACCCTGATTTAGCGCACCTGATTCT
11027	scaffold_1373	86187	TGCAGGTGAAGAAGCCGGATGTGGAGGTCCTGGGCTGGTGTGGTTACACATGGTCTGTGGTTGTGAGGCCGGTTGGACATACAGT
11046	scaffold_1375	148283	TGCAGGCACCCGGCCCGCCACAAGAAGTCGCTAGAGCACAATGAGTCAGGAAAGCCCCAGCGGCCAAACCCTCCCCTAACCCAGA
11153	scaffold_137	1365272	TGCAGGCTGATTTCGGTCGTCAGTTGAACGGTGTTTACTCCAACACATTGGTGTAGCTGGCTTCCGTGTTAAGAAGCGTGGTTTG
11275	scaffold_13849	7942	TGCAGGAATATTTTCACATTTCTATCTCATGGTTAGTTCCTAGGATAATGTAACTCATACATTGACACTCAGAACCTCCTGTCTC
11621	scaffold_139	1251085	TGCAGGTCCTGGGTTTAGGATCTTGGTCATAAGGGCAAAATAAGTGAACCACGGTATAGTAGATAGTGCCTACTGCCTCGGCTGG
11666	scaffold_139	380816	TGCAGGCACATTCCAGGCAGACGCCATGTCATTGGGATCCATCTCACGGACAGACCTAACAAAGCCCAGGTCCATTATCATATCA
11728	scaffold_13	607161	TGCAGGTTCCGCAGCTCGTTGGTGAGGTCACACTCTGTCCTCGAGCTCCGGATGCAGTGAGGGTTCCTTTGTCTGTCCTTACCAA
11748	scaffold_1400	242255	TGCAGGAGGCAGACTATCTCAGTGGGGCACCAGGGTTCCAGCCCAGGTGGAGGATGACTGGGCAGCCCAGCTCGATATGAGCGTG
11786	scaffold_1403	151821	TGCAGGTCAGGGTGGTCATGCTGATGTGACATACCGAGTTTTGAACACAGGTGTCATGCACACCACAAGATTGCTGAACCTGCTG
11884	scaffold_1409	123728	TGCAGGTCAGATTATACCCCCACTCCCATTCCTCCCTCTCATGGTTTAGGGTTCTGGAGTGTCCTGATAAGAGGTGTGATTCTGG
11937	scaffold_140	804111	TGCAGGACAAGCTAAAGCCAAGCCCCCCCAGTCCCAGGGCTTTTCCTGCTCACAGTGCCAGTTCTCCAACAGGAGATGGCTCACC
11971	scaffold_1411	142144	TGCAGGCATCCGGTCCACCACAAGGAGTTGCTAGAGCACAATGAGCCAAGTAAAGCCCCCTACGTGGATATGTACTTCTCCCTCC
12432	scaffold_1431	175528	TGCAGGCTAACAGCACACAGGCATCATAAACATAACCTTCTTTCATCATAACCAGAACCTTCATTTCACTGTAACTAGTTGAATG
12447	scaffold_1432	70884	TGCAGGCTCCAGTTTTATCTTATCTTGACTATTGCCCAATGATATGGTCAAGTGCTGCAAAGAAGGAGCAGCTTGCCCAGAACTA
12475	scaffold_1434	12847	TGCAGGTTCATTCTCTACAACATCCGTAGAGTGTGACCCTAACTCACACAGGAAGCGACACAGGTTCTAATCCAAGCACTTGTCC
12649	scaffold_1440	147951	TGCAGGATGGTAGCTCTCCGGGAACAGGGTTGTAGAGGCCTGCCTTAAGGCCAGAACAGAGGTTGGGAAACGCACAGTACTTCAT
12720	scaffold_1445	48627	TGCAGGTGTTCACTGAGTCCTTAAACTTGACCCCAAAAAAACATCTGGGTCAGATGGATTAGACCCTTTCTTCTTTAAGGTTGCT
13044	scaffold_145	73755	TGCAGGTTAAAATGGTGAATGTGGAGGTCCTGGGCTGGCGTGGTTACACATGGTCTGTGGTCGTGAGGCTGGATGGACATACTGA
13059	scaffold_1460	228993	TGCAGGTGGTAACCCAGGACGACCCCACCTGGTGGCAGGCCAAACGGGTGGGCGACAGCAACCTCCGTGCTGGACTCATTCCCTC
13107	scaffold_1463	127715	TGCAGGTGTGATGTTCGGATGTACCGATCCTGTGCAGGTGTTGTTACACATGGTCTGCCACTGCGAGGACAATCGGCTCACAACG
13137	scaffold_1464	43175	TGCAGGCTTTTCCTGCAGTTCAGTCTGTTGTTCTTCTTGTCAGGAGAACTGCTGACCTCAGCGCAGATGGAGACAACTGCCCATC
13295	scaffold_1470	88914	TGCAGGTGGTCACTGAGTCGGAGGTGCTAAATGAGCTCTTGAAACTTGACCCCCAAAACACTAATGGTTCAGATGGTTTAGACCC
13364	scaffold_1474	72526	TGCAGGTTCATGCTCTACAACATCTGTAGAGTATGACCGTACCTCACACAGGAAATGGAGCATGTCCTAATCCAGGCACTTGTCA
13614	scaffold_14871	4085	TGCAGGTTGGGTCTGATATGAATATATTACTCCACATACACTGAGTATACAAAATATTAAGAACAGATCTTTCCATGACATAGAC
13671	scaffold_148	118909	TGCAGGTCGAATTTAATGGTCTGCAGCAGGATCCTCTCCAGGACCATCACCTCCTCCTGTACAGGAACAGAGTCATGGACAATAT
13682	scaffold_148	339114	TGCAGGCTCATCCTGATATGACCCTTCAGCATGACAATGCCACCAGCCATACTACTTGTTCTGTGCGTGATTCCCTGCAAGACAG
13699	scaffold_148	53889	TGCAGGTTGGAGACGCTAGCCCGATCTCCTCAGACGCAGGCCGAAGTGTTAGCCAAGCCCAGGACACTAGCCCTGCTCAGGAGGG
13746	scaffold_14916	10518	TGCAGGTCAACAGATAGCCTCTCCACCAGGCTAGTTTTCCACTGGTCCTCCCAGCTGTGTGCACAGCACAGCCTGTTTTTCCACC
13747	scaffold_14916	10522	TGCAGGTCAGTACACAGTACAGTCATGCAGAGGACACCATTGGAAAGAAATATCTTCAATCTCATCTGAAAAATATTAGTCAGAG
13750	scaffold_14918	9150	TGCAGGTAGAGACACAACACATTCATGATGACCAGAGACAAAGAGGACTGAAAAGAGAATGTCACCTGCTCTACATTAGTTATCC
13792	scaffold_1493	222255	TGCAGGTGCAGACAACAGACAGCTCTCCCCACTGAGAAACATCAGTCACCTTCTAGAACATTCTTCAAAATGCAGTCCCAACACA
13804	scaffold_14954	11400	TGCAGGTTCACGCTCTACAACAGCCGTAGAGTACGACCCTACCTCACACAGGAAGCAGCGCAGGTCCTAATCCAGGCACTTGTCA
13868	scaffold_14992	11601	TGCAGGTGAGAGACTGTGGCTCCGGGGTGAAACGTATCCTATGTACAGACCTTGGATCTCCTCCAACCTTAACCATTAGTGGGAA
13977	scaffold_15005	8076	TGCAGGGGCAGCAGTGAGCCGCTACGGTTTGCACCAGTAGTTCCCAAGTATTTGCATTTGACCATTTACCACACTATTTTTTGTC
14027	scaffold_15031	10555	TGCAGGTGTGGCGTATTACCCAGTGTGCCAGAGGTGCAGCCAAACTAAACATTGTAAATGCCATTCTACACATCCAGAGCAGCTG
14253	scaffold_1510	90538	TGCAGGTGTGATGTACCGATGTACCGATCCTGTGCAGGTGTTGTTACACATGGTCTGCCACTGCGAGGACGATCAGCTGTAGCGC
14294	scaffold_1513	199529	TGCAGGACATCAACACAAGCAGACCAGAAACACATGTCTGACAATGATGACATTTTGCGTAGGATGGAATTTGATTAGTGTGAAG
14372	scaffold_1517	22233	TGCAGGATACCTACACCACCCAATGTCACAGGAAGGCCAAAATGATCATCAAGGACAACAACCACCCGAGCCACTGTCTGTTGAC
14373	scaffold_1517	22237	TGCAGGGCAGATAGTTTGCCACTGGTGATGCGTTGTGCAGACCTCACTACCCTCTGGAGAGCCTTACGGTTATGGGCAGAGCAGT
14405	scaffold_151	1002874	TGCAGGACGCAAATGTCAGACAAATCATTGGGTTTAAACTACAGAACAGTACAAAACAAGAGAACACACATGGTTAATGTTCTGA
14411	scaffold_151	1133048	TGCAGGCTTATCCTGACATTACTCTCCAGCATGACAATGCCACCACGCACAGAACGAGCAGTATGGCTGATTTCCTGTAAGACAG
14453	scaffold_151	522227	TGCAGGAAAAACTTTGAGCCCAGAGTTTTGCTGGTTAGGTTATTTGGTCAGCATAGCCCACCGGCCCTACGTAAAACACACTCTC
14526	scaffold_15232	887	TGCAGGTTTTGACTGTTCTTGATAGAGATGGCCCACCCACTAAAGATCTGGTCCCAGTATACACTACACGGGTCAAGCCTGGTCT
14650	scaffold_152	162793	TGCAGGTTGGGACTGTTTCACAGAAATGCACGAGGGCAGCTTAACTGGCAGACATGCTCGTTCCTCTAGAGACAGTCACACACAC
14705	scaffold_1531	21606	TGCAGGACGTGGCCGTGCTGCCAGCCCCACAGGGACGGGGAGGTGGCCGGATGCAGGAGAAGCTCCAGGGAGTTCTGGAAGGGTC
14804	scaffold_1539	40509	TGCAGGTCCTTGATGTTGGGGAAGGGGATGCCGATGGTGACCACTGCTCTGGCGTTGTCGTCTGTGAAGTCCAGTCCTTCACTCA
14861	scaffold_153	498	TGCAGGTGAAGCTGGATGTCGAGGTCCTGGGCTAGCGTGGAAACATGTGGTCTGTGGTTGGACGTACTGGATTATGGACGTACTG
15076	scaffold_154	269623	TGCAGGAGGATAGCTCTCCTGGAACAGGGTTGGAGAGCCCTGATCTAGGCAATGCCAAAGTGTTTATCAGTGCCATCTAGCAATG
15108	scaffold_154	928257	TGCAGGCTCATCCTGACATGACCCTCCAGCATGACAATGCTACCAGCCAATCTGCTCATTCTGCGCATTATTTCCTGCAAGACAG
15151	scaffold_1552	182293	TGCAGGTCTGCTGACTTCAAGCTTCCTTTTAAGAGGCATTATCTCAGCAATTCTTTCTTTAAGCCAGTTAAGAACAAATTCTTAT
15371	scaffold_1561	34783	TGCAGGACATCTCCTGTGGTCTGACCTGCAACAAGGTGCTGCTGTGTGACCTCCACCGCTGCCGCCGCATCTGCCACCGGGGAGA
15404	scaffold_1563	39920	TGCAGGTCCTCTCAAACCCAGAGTTTCTTGCTGAGGGAACAGCCATTGCTGATCTGAAGAATCCAGACAGGGTATTGATTGGAGG
15405	scaffold_1563	39924	TGCAGGAGAACAAGATCATGCTCATAAGACCTGACGACATGGCAGACCGATGAATTTAGACGTTCGATACACTGTCCCCTGCAAT
15508	scaffold_156	1404711	TGCAGGATCGTCTGAGACCAGCCAGCTGGACAGCTGATGAAACTGTGGATTTGCACAACCAAAGGATTTCTGCACAAATTATCAG
15650	scaffold_15774	8054	TGCAGGCAGTCACTGAGTCCGATGTGCTAAAGGTGCTCCTTAAACTTGACACCAAAAAACCATCTGGGTCAGTTGGTTTAGACCC
15679	scaffold_1579	117222	TGCAGGCTTATCCTGACATGACCCTCCAGCATGACAATGCCATCAGCCATACTGCTCGTTCTGTGCCTGAGTTCCTGCAAGACAG
15738	scaffold_15808	9428	TGCAGGTCACCTAATAGACATACTTGTTCTTAAACACATCCGTCTGTTTATGTTGTCGTGACAAAGTTGACACTTCGCTTAGATT
15842	scaffold_1586	147519	TGCAGGTGATGGTTCAGGATCCTGGCTCTCAAAAGAATAGTTCATGCCATCTTCTTGGCTTAGTAAATTGGCTGCCACAGCATGG
15859	scaffold_1588	65322	TGCAGGTCGATGTTCCCAACAGGGTGACATTCACAGCGGCAGATATACTTTTGAGGAGATGGGAAACATTGCCCTTGCTACGGTA
15935	scaffold_15910	9589	TGCAGGATCGTCTGAGACCAGCCACCCAGACAGCTGATGAAATTGAGGACTATTTCTGTCTGTAATAAAGACCTTTTGTGGGGGA
15945	scaffold_15924	9387	TGCAGGTTGGAGCGGCGCAGAGTGGTCATTAAGAAGGGCCATTGGGGACACAGCTTCTACTTTGTGTTCTCTGGGCTCCTGGCCG
15998	scaffold_1596	46467	TGCAGGATCTTCTGAGATCAGCCACCCGGACAGCTGATGAAACTGTGGGTTTGCACAACCAAAGAATTTTTCCATAAACTGTAAA
16057	scaffold_159	1444704	TGCAGGCAAGGTGGGGGCGAGCTGTTTGTAAAGACACTTGAGACTAATCAAAGTCCAGGGATCCTTACTCACTAGAAAATGGCCT
16116	scaffold_15	1773283	TGCAGGAAGATGGCTGATGTGAAGTGAATGACTTTGATCATGCAGTCTCATTATACAGCATTTCCTGTGTATAAAGTACCAACAA
16168	scaffold_15	2712038	TGCAGGTGGTGAGCCAGGACGATGCCACCTGGTGGCAGGCCAAGAGAGTGGGCGACAGCAACCTGAGGGCCGCCCTAATCCCCTC
16267	scaffold_1602	130769	TGCAGGTAGAAACGTAATATAGCCGACTACATTCCTTCTGCGCCCTGCTTCTAGTCATGAAGAAAACTGTCTGTTCTACACAATG
16311	scaffold_16048	2870	TGCAGGCTTGGATAAAGCCTTGGATCTCTCCACCACTCCCGTGGAGTATCAGGACCTCTGGGAGGTTTTCAACAAGGCCGGCGCC
16581	scaffold_16172	8362	TGCAGGTACCCCTCCTCGTTTATCAACAGGCAGTTCAGGTCTCCCACCTCCGGGTGGGGAGATGGCGTTGGCGACTCCACCTGCT
16728	scaffold_1620	64197	TGCAGGTAGAAAATATCCTGATAAAAATAAATATTGGCTACGCGTGGCCTTTCTGCAACGAACTTGAAACATTGTATTAACTTAG
16891	scaffold_162	440724	TGCAGGAAATGTGATAATTTCTGTTTGTGATCATGATGAGAGGTTAAGATGGGGTTACCTTGCTTGTTGTAGCTAGCTGGGTTGT
17053	scaffold_1638	47859	TGCAGGCGCTGGTATCGTATTACAAGGACCACATCGCTGAGTCATGTCTGGTGGTGAAGGCCAGCATCCCGGAGTCGTCTCTTCA
17055	scaffold_1638	62792	TGCAGGATGACCCAGTGTCTGTGTTGAGAGGCCTTCTGCAGGGACCCTGTCAGCCACCTCCTCCTGACCCAGAGACACATTGTGT
17243	scaffold_16451	4276	TGCAGGCAGTACCAGCTCAGACAAACACTCCTAAAAAGCTTCTATCCCCTGACCATAAGACTTAAATGGCTAACAACTACTACCT
17335	scaffold_164	200839	TGCAGGATCCTCTGAGACTAGCCACCTGGACAGCTGATAAAACTGTAGGTTTGCACAAACAAATAATTTTTGCACAAATTTTCAG
17405	scaffold_1653	70509	TGCAGGATGGGTACCACATGAGGGAGGAGGATGTCTTCCCTGTAACACACAGAGTTTATGTTTGCCCGCAATGACAGCAACCTCA
17463	scaffold_1658	136268	TGCAGGTACCATGTTCATCTGTAGGTACAAACCCCATGGGACCACGCAGCCGTCATACCTCTCCGGAAGGAGACATGTTCTGTCT
17473	scaffold_1659	71269	TGCAGGCAGTCACTGAGTCCGAGGTGCCTAAACTGCTTAAACTTGACCCCAAAAAAACATCTAGGTCAGATGGTTTATACCCTTT
17522	scaffold_165	989801	TGCAGGCTCATCCTGACAGACAATGCCACTAGCCATTCTACTCGTTCTGTGCATGATGTCCTGCAATACATGAATGTCAGTGTTC
17546	scaffold_1661	87462	TGCAGGCAGAATGCCAATTGTATGCTCCCTCAAAACTTGAGGCATCTGTGGTATTTTGTTGTGTGGCAAAACTGCACATTTTAGA
17555	scaffold_1662	126319	TGCAGGCTCATCCTGACATGACCCTCCAGCATGACAATGCCACCAGCCATACTGCTCGTTCTATGCTTGATTTCCTGAAAGACAG
17606	scaffold_1668	139193	TGCAGGTTCAATTTTGGTCTCATCTTGATTATTGTCCTGCAATGTGGTCAAGTGCTGGCAGAACTCTGGCAGATGGCTAATATAT
17652	scaffold_166	217680	TGCAGGAGTGAGCCAGCAGCTGGAGGGTTGCTGGGTCTAATATCCTATGTCCTACCTACTACCATTTTGCCCTTGAGCAAGGCTC
17753	scaffold_16749	1434	TGCAGGATCCACCTCACCTGTCCAGGTGTTCTGTGAGATGTCGATGGACAGTGCATTTTCAGGAAAGTGGACGGTCAGTATCCAA
17816	scaffold_167	1200994	TGCAGGTTGTTGTCACTCAGGTTCAGCTCTCTCATTTGTGAGGAGTTTGAGCTGAGAGTCGAGGCCAGAAAAGCACAACAACTCT
18218	scaffold_169	992300	TGCAGGATCAAATTACAGTTATTTGGTCAAACACAAAAAAGGAAAGATGACCGTAGGCTCAGTACTGCTCACTGTGTCTTAGTGT
18456	scaffold_17082	3551	TGCAGGCAGTTCTGTTCTGTTAATTCTCTTGTTCCATTGACCCTCCTGAGAACAGATTAATGCAATGTATCCCTCTTCCCTGCCC
18608	scaffold_1717	130026	TGCAGGTGATCTTCCGTCAGGGAGAGTTGCTGGTGGGGGTGTTGGACAAGGCCCACTATGGTAGCTCAGCATACGGCCTGGTCCA
18776	scaffold_1726	153851	TGCAGGTTCAGGGTCACAGGTCTGTGGACAACGTCACAATTGCTATAGCCAGCACAGAATCTCAAACGCCATTCATTATTTGCAC
18865	scaffold_172	375539	TGCAGGCTCCATACTGCTCGTTCTATGCTTGATTTCCTGCAAGACAGGAATGTCAGTGTTCTGCCATGGCCAGCGAAGAGCCCGG
18866	scaffold_172	409716	TGCAGGTACAGTAGTGATGTATGGAAGGATAGATGAATGGGTCAGGAGCTCTGCTAGTAGAAGGTTATGGATGAGGCTATCCTTG
18894	scaffold_172	936157	TGCAGGACAACCTCACTGGGTAGCTGGGCCGCCCGGAAAAGATCAAGAACTTTGCCGTTGGAAGCCACTTTCTTGGTGTTGTCCG
18956	scaffold_1734	94792	TGCAGGTCTTTAATGTCGTTCTTCTGGCCCAGGACGAAGTAGGCCGTCAGAGCCTGACCAGCAATGAGCAGGCAGGCCAAGAGGG
19487	scaffold_1765	66368	TGCAGGTAGGCTACGGCCTTTTACCCTCCCACTTGGTGTTTTTAATAAAACACAATTTTTGTGTTCGCCAAATTCTATGAACGCA
19502	scaffold_1767	43395	TGCAGGTATAATCCTTTATGTCAATGGCAGGTTACTACTGTCTGACAGGAACACATCTGCTACGTGTCTATTGGAGGGAATTATT
19651	scaffold_1778	105999	TGCAGGTGGGGGAACAACACACAAAAACACCACATTACTAAATTGCCTCCCATTTCCTGAATCCACCTGTTGTGGCATCCATACT
19779	scaffold_1784	117826	TGCAGGTCTGTGTGTGTGTGTGTGTCGTTCCCAAATATTGGGGTTTTATATGTCCTGAATATTGAGTGTATTTATACTGCTACCA
19816	scaffold_17883	8860	TGCAGGAAGACAAGTTTGAGGAGTATGGATACACTCTCATTGCACCAAGGTAAGAAGATTGACTGTTATTTGTAGAAAGGTTTTA
19890	scaffold_178	946990	TGCAGGACGTCAAGCCCTCGCTGCAGTACGAGTTCGTGCCCCTTTCGGAACCCTTTGGACCCTCCGTTATTGATGCCCAGCTGCA
19915	scaffold_1791	51060	TGCAGGAGAACACCATACTGAAGGCAACAGAGGTGCAGTTTCCCCCCAAACCAGTAGTCACCCCAGAAGCTAAGGTACTGCTTGT
19941	scaffold_1792	93579	TGCAGGAGGAACCGCCCCTGCACTGCAGAGGGGCCGTGACAATGGGAATATATGGGAATTAACGGAAATATTTGCAAATTAATAT
20048	scaffold_179	278753	TGCAGGACGGACAGGAGGTACAAATCGCAAAACTGTTAAAATAATAACGGTGGTGTGATACATTTTATTGACACTGTTTGTCTTG
20061	scaffold_179	372911	TGCAGGATAGACAGGTGTGTCTGCCACATGACAGTGGTAGATGTAGGGTTGGTTGGTATGGGGTCTCTCCAGGGTCTGCTCGTCA
20083	scaffold_179	70287	TGCAGGCTCTAGTTTTGTCGCACCTAGACTACTGCCCAGACGTGTGGTCAGGTGCCACAAAGATGGACTTGGGGAAATTACAACG
20086	scaffold_179	739689	TGCAGGATGTCTGGGCTGACGCAGGTGTAGTTCTCCAGGAACGATCTGCGTGTGTCCTGCAGCTGCGTGTGCTGGTCCTGCTCAC
20117	scaffold_17	136415	TGCAGGCTCTAGTTTGGTCTTATCTTGATTATCTCTAATGTTTTATGCAGTTATGTCCTTGAGCTGTTCTTGTCTATTGATGTTT
20135	scaffold_17	1698750	TGCAGGTAGATATAAATCCTGATCAAAATAAATCACATTTGCTATGCATGGACTGTCTGCCAACTATCAGCTTGGTCTAGCCTGA
20201	scaffold_17	750027	TGCAGGTGAAGAAGCTGGATGTGGAGGTCCTGGTCTGGCGTCGTTACACATGGTCTGCTGTTGTGAGGCCGGTTGGATGTTATGC
20528	scaffold_181	1344278	TGCAGGATTGTCTGAAACCAGCCACCCGGACAGCTGATGAAACTGTGGGTTTGAACCAGTGAATAATTTCTGCACAAACGGTCAT
20544	scaffold_181	497913	TGCAGGCTCATCCGGACCCTCCAGCATGACAATGCCACCAGCCATACTGCTCGTTCTGTGCGTGATTTCCTGCAAGAAGGGAATG
20579	scaffold_181	857997	TGCAGGTTAATGATCTGCAACAAAAGGCAAGGATCCACTTTCTCCAAAGAATTCAATCCTACTGGACCAGATTCTTCTTCATCAT
20649	scaffold_18253	6390	TGCAGGTATCTATGAACACGGTAGGGCATAGGCTGCTGTCCATGTGACAGGGTGACACCACTCTGCACCTCCCCAAACCCTATTT
20703	scaffold_182	107466	TGCAGGAATGCAGCCCTCTAGTGCAGTCAGTACACAACACTATGCTCACTGTTTCTTAGCAGGATCAGATGGTGACAGGGGTCCC
20776	scaffold_1830	141846	TGCAGGAATGTGAAATTGACTGGCTTGATGAACTCGGGATGGCTGGGCAGTGATTTTGGTTCATCTCAATCACTCGTTAGGGTTG
20966	scaffold_18451	2443	TGCAGGTCACAACATACACAATGGAGCGGTAACGCTAACCGCTAGGGATGGGGTTATGAAATCATTTCACTATCCGAACAGTATC
20969	scaffold_18456	6478	TGCAGGTAGTGCAGCCTTCCACAGTTCCGCTGTCCATGGTGCTGAAGTGAGCGCACCTGTCTCCTGTGCTGATGTGGGTGTTCTG
20984	scaffold_1845	88278	TGCAGGCTCATCCTGACATGGCCCTCCAGCATGAGAATGCCCCCAGTCATACTGCTCGTTCTGTGCATGATTTCCTGCAAGGCCA
20994	scaffold_1846	152086	TGCAGGAAACCGCTCCTGGTACACAGCAGCAGGGACTAACGAACGTCCCATTACAAGTGTAGATACGGACTGCTTCTTCACACCG
21251	scaffold_1861	23497	TGCAGGTGGCGTTTTTTCCTTTGGCACGACATGGAGTGGATTAGCTGAAGGGACTGGTACCCACAATAAATGCCTTTCATTTTTG
21269	scaffold_1862	74638	TGCAGGTTAATCACCGTCTCTACAGCGATACAAACATCAAAGCGGTCAGTAACATGTTTCACATATTTCTAGTCAACCTGTGAAG
21347	scaffold_186	270369	TGCAGGTAGTGACCGGGTCTGAGGTGCTAAAGGATCTTCTAAAACTTGACCGCCCCAAAAAAACATCTGGGTCAGATAGGGTCTA
21671	scaffold_188	641808	TGCAGGTAGGAGAGAGACATATCTCCTCAGTCCCCTCATGTCAGAAGATATGAAAGAGGCCTTTTGAGTGAGCTGCATCAGGAGG
21699	scaffold_1891	22433	TGCAGGGAAGGGCTTCTTTGGTACATTTGTTATGGCACTTTAACCTGGAAGCAGAGGACAGAGTAGTTCAAAGAGGAGCAAAGAA
21711	scaffold_18937	639	TGCAGGCTCATCCTGAAATGACCCTCCAAGCATGACAATGCCACCAACCACACTGCTCGTTCTGTGTGTGATTTCATGCAGGACA
21835	scaffold_189	778813	TGCAGGGTTTCCCAAGTCCCTGAAGACACGCGAGGAGCTCACAGAGTATCTGACTGTCATCATCTTCACTTCCTCTGCACACCAC
21940	scaffold_18	552128	TGCAGGATATCCTGCTGAGACTGATTGTGACCAAATGGCTGAAAGATAAAAATAAGTCGACAAGTTAACTTATCTTTAAAAAACG
22081	scaffold_190	1063128	TGCAGGTTAGAAGATTCCACCATGGGCAACAACAACTGGCTAATAGAACTGAACTGATGTACATGGGGCAAGGAAATTTGGTATG
22119	scaffold_190	871585	TGCAGGAAGGGCACCACATGAGGGAGTCTTCCATGTAATGCACAGCATTGAGATTGCATGCAATGACAACAAGCTCAGTCCGATG
22147	scaffold_1912	43464	TGCAGGTGGCAGCGCAGCTGGGGAGTGACTCACAGATGCTGTCAGCTCCAGAGTCTGAGCCGTCTCTCCCAGCAGAACCCTGAGG
22150	scaffold_1912	62226	TGCAGGGAATCCTGGAGGTAGAGGAGGCTGTGGCCTGAGTGACAACCCACACTGGCCTCCCTACAGACAGGCACGGAGCACGTAT
22181	scaffold_1915	18472	TGCAGGTGTTTGCTCAGCCCGTCAATGTGAGTAAGACCAAGATGGACGTGAATAACCTGGCCATGGTAATGGCTCCCAACTGTCT
22303	scaffold_1923	130922	TGCAGGTCTGCCATAGCAACTCTAGTGGTCGCCATGGCGACGATTAAGCACCCAAGCTATTCTAAGATTGCGTTGTGCACGTACA
22446	scaffold_192	839908	TGCAGGACGGTAGCTGTCCAGGAACAGGGTTGGAGAGCCCTGTTCTATGGCGTTGTGCCGAGGGTCAGTGCAAGGTGGAATGCGC
22469	scaffold_19314	5400	TGCAGGTTGAGTTTAATCACTACTGTACATGCAGATGTATGGTGAGATGCCGGAGGAAGCTTTGAATAGGTCAGTAGCCTACAGA
22535	scaffold_1937	111138	TGCAGGTTTTGGTAGCAGGTCGTGTCAGTGGCACTGTAATGTCCTCAAAGCGAGAAAATAAGTTGTTTAGTTTGTCTGGGAGCAA
22536	scaffold_1937	138684	TGCAGGTCAGGTTCACTCACATGTAGAGCATAAAGATAGAGAGGGTGTCTGAGTGATTGGGCCTTTTTAACATCCACTGGGCCAA
22729	scaffold_194	38994	TGCAGGGGGAGGTGGCCCGCCTCAACGCCAAGTTCCTGGTTAACCTGGACCCCTCATTCTGCAGTAACAACGGCACGGTACATCT
23059	scaffold_1968	99558	TGCAGGATGGCACAAATGATTGATTGTTAGTTTTGATATTGGTACCTTTCTTCATTTCCTTCATTTCACAGGCTACCATAGTGGC
23112	scaffold_196	844869	TGCAGGAGTAATATTTCAACCGAGGACAGAGGAGAAGGGTCATGGCTTTGAGGCCGAAGACAGGAGGAGCAGGTCTTCTAGCATA
23131	scaffold_19716	7366	TGCAGGAAGAGTACCACATGAGGGAGGAGGATGTCTTCCCTGTAAGGCATAGCAATGAGATTGCCTGCAATGACAACAAGCTCAG
23157	scaffold_1972	115246	TGCAGGAACATCTGGGACAAGCTGATGAAACTGTAGTATTTATGTCTGTAATAAGGCCCTTTGGTGGGGAAAAACTCATTCTGAT
23174	scaffold_1973	26336	TGCAGGCTGCTAGTGCAGAAGCTCTCGTCCACACACTGGCCACCCAGGGGCACACACACGCACTGACGCAGGGCCAGCACGCACA
23329	scaffold_1983	83202	TGCAGGTCACCTCCTCTCATGGCTCACTTTTTGTTCCGGCACCTCCCGATTTACAAATCAAGCACTGGATGTACATAAGATTAAA
23341	scaffold_1984	127718	TGCAGGTCAGAAAGTGTGTCCCCGGTGATGCTCTGGGCAGACCGCACCACCCTCTGGAGAGCCCTACGGTTGCGGGCGGTGCAGT
23482	scaffold_1990	137231	TGCAGGAGAATAAAATGGCAGCTGTGCTTCCTAACGAACCACATGCAGTACAGGTGAGGTTCTGTATCCACTATCACACCCTGTC
23537	scaffold_1995	85656	TGCAGGACCAGACCAGGCCACACACAGTTTGCACGTGAGAAACAGGCAACTTTCATGATAATGTAGGTGATTTTCAGGTGAATTA
23627	scaffold_199	780166	TGCAGGACAGAGGGGTGCCCAACGAGCTCATTGCCTCCCTGAAGTCGGTGTACATGAACATCGAGTGGTTGCAAAAGCAAGACCG
23747	scaffold_1	2593616	TGCAGGCTAATAATGCATGTAATAATAGCATATTTGATCTACCCCAATGAAAACTTGGGACAGTCGGCATAAATCGCATTTCGAT
23775	scaffold_1	3158728	TGCAGGATTTAGCTGAGTGGAAATTTGCCCTCTGCAGATTTTTTTTCCTTGTACGACCCCCGCCTCCTTCCTGAGGAGGACGGTG
24014	scaffold_2007	45282	TGCAGGATAGGCAAATCATTTCCAGACCGCTCATCTGTAGAGGAACTCTGACGAGTCCCCCACCCAAGCCTCTCGACCATATGGG
24027	scaffold_2008	70148	TGCAGGTGAAATCCCGGAACAGCACACCTGTATGTTACGCACTGGGCAAAGCACTAGCACCGACGGCAATAACAGGTGAACGCTC
24028	scaffold_2008	70152	TGCAGGTTGCAGCATTGTTCCTGAAACGGGACTCAACCCTCTTACCTGTCACCTAGACCGCCGGGCGCACGTTTTGGTTTGCCCT
24128	scaffold_20132	5796	TGCAGGAGCGAGTGCTGCTATGGTGACCAGCGAGCTGAGATAATGCGGGGCTTTACCAAGCAGAGACTTGTAGATAACCTGTAGC
24137	scaffold_20146	7659	TGCAGGTGACAGCATTCCTTCCCCCATATGCCCCCTAGACACAACTATGACAATATAACCAACAAAAATGGGTCACAGCTCCTGC
24147	scaffold_20156	434	TGCAGGTACAGCGTATAACCAGCCAGCTGTATGTTGATGTTGTTGTCTTTCAGCCATGACTCCGTGAAGCATCTTCCTCGCAACT
24166	scaffold_2016	5346	TGCAGGAGGAACTGCCCCCTGCACTGCAGAGGAGGACCCGTGACACTCCATTTTGCTCATACTTCCCTATAGGCAGAAACTCAAA
24321	scaffold_202	1130253	TGCAGGTGGCAGACTGCGTCAATGAATGTATAAAAAAAACAGGTGGGATTTTGCTAGTAGAGTAAATTTTTGAAGAATTATCTGG
24349	scaffold_202	673484	TGCAGGAGAGAATCCCATCTCCCCCTTCCCCAACCCCTTTGGTTGCTTTGGGTTGGTCAGATAAGGCTCGGTCTAGTGTGGTGCA
24510	scaffold_2042	13392	TGCAGGTACAGTCCACTCTTAGAAAAAAGGTGCTATCTAGAACCAACAAGGGTTCTTCTGAACCCTTTTTGGTGCCAGGCAGAAC
24580	scaffold_2048	627	TGCAGGTTAGGCCCTACTTCCTTCCTACCACATTGATCATATACCCTGATTACACCCAGACCCTTACAATAACCACGCCACTCTT
24712	scaffold_20558	2851	TGCAGGTACCGCTAGGGCCCCCCAGGTAGGAAGGGTGTCTGGTGACAGAGGGAAATACGGATGATAAATGTTATTACTGTATGTG
24721	scaffold_20568	6437	TGCAGGAAGGGTACCACATGAGGGAGGAGGATGTCTTCCCTGTAACACACAGCGTTGAGATTGCCTGCAAGCTCAGTCCGATGAT
24926	scaffold_206	917323	TGCAGGTATTTGGCTCCGAAGCCCAGCACCCGGCTCATAGGGAGGCTGTCCACTGCTTACAGGCGACTGGTCACCTGGTGGAGCA
25109	scaffold_2081	7715	TGCAGGTAAGGTCCTGGTGTCCTCTATGATGGGCGAGAGCCGCTCCGCTGTGCTGGTGGCTGCCTACCTCATGATTTTCCAACAC
25110	scaffold_2081	7719	TGCAGGAGAAGAAGACAAAAACACACTTCCCATTGGTTACACTTGACATAAGAAATAACTATTTTTCAGTGTTTACATGTAGTTA
25453	scaffold_20	165955	TGCAGGTGGTCCAGCAGTCTGCCGGGTGTGGCCACCAGGATGTTGACACCGTTGGCCAACCTTTGGGCCTCGGCAGTGCGGTTGC
25526	scaffold_20	598617	TGCAGGTCACATTATGCTGGCTTGCAAAGTGATGTGTAATTCCTATTGGAATCCAGCCAGAGTGAGGATATCCAACAGTTGACAG
25545	scaffold_20	942093	TGCAGGTGTGATGTTCAGATGTACTAATCCTGTGCAGGTGTTGTTAAACGTTCCTCGCAGTAGCAGACCACATCAGCTGTCCGTC
25775	scaffold_211	112956	TGCAGGACCGCTGGATGGAACATGATTACACCCTCAGACCTGTCTAGTCTTCTCCCACAATGCTGTGCTCACAGCTCACAGGAAG
25778	scaffold_211	1139406	TGCAGGAGTCAGGGAGAGGAGAGTTACCTTAAGCACGATGATGACACTGGTGGAGAAAAGTACCAGTCTTAGCCAGAGCCAGGAC
25792	scaffold_211	216894	TGCAGGACATAATTTTGTGATTTTGACGCTGTTGTGTTTTTCAGATGAAGATGGAGCTGACTGACAGTGACTCAATCACCCATGA
25793	scaffold_211	221546	TGCAGGAAGGTAAACCTTCGACCCAGTCTGAGGTCCTGAGCGCTCTGGAGCAGGTTTTCATCAAGGATCACTCTGTACATTGCTC
25843	scaffold_2122	12686	TGCAGGCTGGTTCTCTGTAATCTGGGCTTGGTACTGGTTCTCCTGGAACCAGGGCACCTGGTCGTTCACGTCGATGACCTGGACA
25930	scaffold_212	609749	TGCAGGAAGGGTACCACATGAGGGAAGAGGATGTCTTGGTGTAACTCGGGCAGTTGTTGCCATGCTGTACCTGTACCGCAGGTGT
26037	scaffold_213	1190638	TGCAGGTTAGGTATGGAGGGAGAGCGAAGTGAGTATTAGTAAGTGGTCCCTTCCTACATCTCCACATGCCCGAGAACATGGCTAC
26273	scaffold_21515	6750	TGCAGGGAGAGGAAGGAACTGGGATAGAAAACACACACATAGTTGCCAGCGATACAAAAGAGAAAATAATAAATAACTAGATAAG
26327	scaffold_21572	1627	TGCAGGCCATCTCGCGCCTTGTGCTCAATAATAAATGTGTCTGCATCATGCAGAAGTGGGGAGGCAAGAGGGAAGTAATGTACAC
26430	scaffold_21641	4493	TGCAGGTTGATAAGGCTCTATCGATACAAACACAGTAGATAGACAGGGTTTGGTTTTGAGACAGAGCCAGTTCTCTGATTCTCCT
26542	scaffold_21738	5457	TGCAGGAGCGAGTCACTGCTTTGATGTTTGCAGAGAACAACAGGGGGTTGTCCAGGGTCACGCCAACGTTCTTTGTGATGAATTT
26553	scaffold_21748	1696	TGCAGGTAGAAAATATCCTGATAAAAGAAATATCATATAAATCACATTGGCTACGCAACGAACTTGAAACATTGTATCAACTATT
26619	scaffold_217	164470	TGCAGGTTTTACTGTACCTGACTCCACATCTGTGATAGTAATACCATAGTCGTCTTTGTCACCTATCTGCTGTTTTCAGTCACAC
26636	scaffold_217	453209	TGCAGGACGTCAAGGTGTGCTAAGTGCTTGTGTGCATGTCCATATTTCGCCTGTGTGCAAATGCATGCTTTCAGTGGGAGTTTAT
26672	scaffold_21831	4073	TGCAGGTTCTAGTTTAAACTTATCTTGATTATTGTCCAGCCATGTGGCCAACTGCTGCTAAGAAAGCCCTGGTTAAGCTGCAGCT
26759	scaffold_218	105298	TGCAGGACAGAGAGAGAGAGGGGTAGAGCAAAAGTGTAGGGCGGGAGAGTCCGTGGCAAAGAAGATAAAATCAGGCTGTGATCCA
26866	scaffold_21991	5395	TGCAGGCTCCTGAAGGAAAATACCACAGGAGATATTGAAGAGTACTGACTCGAGACAACTTCACCAAACTGTCACCAAAACACAC
26934	scaffold_21	1074089	TGCAGGAAGCCCTGGTCTGTCACCAGCAGGTACAGGTGGCCCTGTGGGGTCAAAAGTCATTCACTGGAGGGGAGTGAGCAGCGTT
26939	scaffold_21	1168384	TGCAGGTGAAGAAGTCAGATGTGGAGGTCCTGGGCTGGCGTTGTTACATGTGGTCTGCGGTTGTGAGGCCGGTTGGTCGTACTAC
27093	scaffold_2205	31404	TGCAGGATGAACGATGCTGGCTGCTAGATATACTCAGACTAAATGACACCCTATTCCCTATATCATGCACTATAGTAGTGCACTA
27097	scaffold_22067	120	TGCAGGTAAACACAAAGGAACAGGCTTTACAGTTCACGAACAAACACGCTGTCTACAACTGTAGACGCTCACAACTCAGGGGTCC
27130	scaffold_220	1013356	TGCAGGCAGTCAGTATCACAGTGGAGAGAGAGGGTGATTAGGAGGCAGCATGCAGCTATGCCTGTTGCTACAATGACATCTACTG
27171	scaffold_220	543158	TGCAGGTAGGGAGGGACATATCTGTGGATGCCTGTGTGTAAATGAGAGAGAAGAAAAGACAGAGGCTAGAGGGCGTTATATGTGT
27200	scaffold_22115	5894	TGCAGGACAGCACCCAAGGGATGGTTTGGAGTCACGGTCTAGTTGTCAGCTGATTTGCACTGGCAATAACAGGCTATTGAGTTCC
27372	scaffold_2228	111048	TGCAGGCAAATATTACCCCGATCCTTCATCTTTAATGGAGGAAACACAAGGCTGCAAGGTGATTTCTACTCTGCTCTTCCGACGG
27432	scaffold_2230	69445	TGCAGGAAACCAATGGACTCCATTTGAATTCAAATTCTATCACTTGAATCTGAAAGAATGACTCGACTGCCCCCCACATGAAGAA
27512	scaffold_22390	2866	TGCAGGCTCATCCTGACATGACCCTCCAGCATGAAAATGCTGTGCGTAATTCTGCGCATAATTTCCTGCAAGACAGGAATGTCAG
27544	scaffold_223	35522	TGCAGGTTTTCTGTTCTACATGATAATTAACTGCAAGCACCCGGTGTCCCAGGTCTAAATCAGTCCCTGATTAGTGGGGAACAAT
27741	scaffold_22543	4394	TGCAGGTGTAGGTTATAATGCATTGTGAGACTTGTCATACGCATATTGTCTTATTATCATTTCCATGGTGAAGACTTACTCTCCT
27852	scaffold_2262	38484	TGCAGGTAAAAGTCTCCGGGGCGCAGCAAAAGAGGGTTGAGTGAGGCCAGCTGGATCACGGTCCTGTCGCGGAGGCATAGGGGCC
27976	scaffold_226	768179	TGCAGGTGCAAAGTATTTGTTGGAACAAGAGTCACAGACATACAGGAGCTCACGTATCCACAGGCCTGTTGTTACGTGGACACGG
28121	scaffold_22815	4946	TGCAGGTCTTTTGGCCAGGGTTGAATGTTTCTATTGAATTCACTATAGGTGTCATGGCCATTCTTCATCATCACTAATGATATTC
28122	scaffold_22815	4950	TGCAGGACTGTCTTGTTCTTTTGACAATGTACTTTACTGCCCTCTTAATGCCAAAAGCCCTTAGCCATACAAGCCATTGCCATTC
28130	scaffold_22834	3835	TGCAGGAGCGAGTCACTGCTTTGATGTTTGCAGAGAATGACAGGATGTTATCTGCGTCATGCCAAGGTTCTTGGCACTCTGGGAG
28331	scaffold_22962	2847	TGCAGGACCACACGTGCCGTCCTCCCCTGGCGCCATTCTGGTGGGGGGAAAAACCCAGGTGTGCATCTATGAGTCCCTTTTCAAG
28386	scaffold_229	239592	TGCAGGTGAAGACGCCAGATGTGAAGGTCCTGGGCTGGCGTGGTTACACGTGGTCTGCAGTTGTGAGGCCGGTTGGACGTAGTGC
28395	scaffold_229	29164	TGCAGGCTCATTCTGACATGACCATCCAGCATGGCAATGCCACCAGCCATACTGCTCATTCTGTGCGGGATTTCCTGCAAGACAG
28449	scaffold_22	1324494	TGCAGGCGTCCTGTTAGGAAGTCCTGGATACAATTGCAGAGGGAGGTGTTCATTTCCAGGATCCTTAGTTTAGTGATAAGCTTGG
28501	scaffold_22	2473377	TGCAGGATTATAGGAAAAAAACTGTTGGGAAATAAATGTTTGAGTTTCAAATACCAGATGTTCAGTGAATATGAGTATATTTAGA
28815	scaffold_231	224815	TGCAGGCTGTGTCTGGCATACGGGGGTGCTGATGTCACCCGCTGTTTCTTCTGGCTCCTGCAGAGGGCAGGCTTCCCCTACAGGG
28903	scaffold_2324	16844	TGCAGGCTGGACTGTGGGCTCCACGTTCAGCTTAATTGTAAGCAGCGAGTGAAATCCTTGGTGCCCTCCTCTTTCTCCTTCTCTA
28941	scaffold_23292	5437	TGCAGGTTACGGTTAGGGAAGTGAGACTTGTAGTCCTCACTGTGGAACAGAAGAGTGAGATTAGATATCAGGTCAGATGGCAATA
29030	scaffold_2333	8433	TGCAGGCTGACCTTGTTGTCAGTTGAATAGTATTTTTATTTTATTTCACCTTTATTTAACCAGGTAGGCCAGTTGAAAACAAGTT
29155	scaffold_23430	921	TGCAGGCGTCCGGCCCTCCACAAGGAGTCGCTAGATCACGATGAGCCAAGTAAATCCCCCCCGGCCAAACCCTCCCCTAACCCAG
29291	scaffold_2354	57227	TGCAGGCTGTACTCCCAGGCTGCGTTGCTGACGTCTGTGTAGATGGCTGTGTTAACTTCTTTAGAGCACGTACGTGATGCAGCCC
29307	scaffold_2356	43454	TGCAGGAGGAACCGCCCCTGCACTGCAGAGGAGGAGCCGTGACACTGTATATAGACTTTTTGTTTTCTTTTGTTCTACTGTATTA
29367	scaffold_235	485345	TGCAGGATGATGCCATATTCTGCTGTATTTAGCTTTGAGAGAGGGGGGAGGATGGAGGTAAGAGGGGAAGGGGCAACTCCTGTCA
29376	scaffold_235	623546	TGCAGGGTTGGGCTCGAATAGTATGCTCTCATCACTTTGATCGCCTCATTTGTACCATCCATGAACTATTAATGCTCTGTACTGT
29481	scaffold_236	181850	TGCAGGAACGAGTACTGCTTTTAAGTTTGCAGAGAACCCCAAAGTTCTTTGAACTCTGGGAGGGGGACACCATGGAGTCAACCAT
29632	scaffold_2380	336	TGCAGGACCCGCAGGAAGAACTTCTGGGTGGACGTCTTTGAGGTCAGGGAAGACATGCAGGGCAGCTGCAGCTCCCGTCCGCCCA
29826	scaffold_2393	97417	TGCAGGTGAAGAAGCCGGATGTGAAGGTCCTGGGCTGGCATGGTCACACGTGGTCTGCGGTTGTGAGGCCAGTTGAATATACTGC
29945	scaffold_23	1439403	TGCAGGATGCTATTGCAACCAACCGGCACACTCGCGCACACCCTCCTTTTCCGCCTCCTCCGTCTCTCTGCTTTTCCCAGGGCAG
29961	scaffold_23	1701436	TGCAGGCTGAACATAGACTGCAAGAACTAGGTCAAGGATGATGTATATACTGTAAATGCTGGATAGCTGATGCTATGTATTGGCC
30041	scaffold_23	990196	TGCAGGAGCGAGTCACTGCTTTTGTTTGCAGAGAACGACAGGGTTTTGTCCAGGGTCATGCCAAGTTTCTTTGTACACTGGGTAG
30047	scaffold_24009	2968	TGCAGGTTGAATGAAGCTCTCTTACCAAATGTCACTATTAGTGTTCCATAGATTTCCGTGCTGCTATCCTCCTCTCCTGTCCTCT
30317	scaffold_2422	49622	TGCAGGAATGACTCTCCTGACTGCTTCAGACGACGCACCTTAGTCACGTCCTTCAGCACTGACTGGCCCACTGGACGACACAAAG
30379	scaffold_24296	212	TGCAGGCAATGAAATGCATATAAGGAATATCAAACCAACCCGTTTTAGAGGGAGACACTGGGTCTGTGCCCGCAGAAAGGGAAAC
30434	scaffold_24301	3678	TGCAGGAAGGATGAGTTTTTCTTTTAAAGTTGCTTTCTAGTGAGCTCTGTTCCCTTTGTCAATTACCCATACTGCACTGCAATCT
30437	scaffold_2430	8928	TGCAGGCTTCTGGCCCGCCTCAAGGAGTCACTAGAGCTTGATGAGCCAAGTAAAGCCCCCTGGGCCAAACCTGGACAACATTGGG
30438	scaffold_2430	8932	TGCAGGATGACTACGCTTGTCAGTTGAACTGTGTTTCCTCCGACACATTGGTGCAGCTGGCTTCCGGGTTAAGTGGGCTGGTGTT
30543	scaffold_243	225756	TGCAGGCTCATCCTGACATGACCCTACAGCATGACAATGCTCCCAGCCATGCTGTTCATTATGTGTGTGATTTCCTGCAAGAAAG
30552	scaffold_243	355276	TGCAGGTTAATCTTTTATTGAAGGCAAACCTACATGCACATCGCTAGAGCCCAAACATGCCCTCACTGGCACATCACCCCCTCAA
30664	scaffold_244	527787	TGCAGGTTCCCAGCCCACCCCATAAAGACAGCACACACACACAGTCAGCTTTCTTGACCACCATTCCCCGGATGTATAGGCTGTT
30726	scaffold_24538	4897	TGCAGGTTAGAGAGGTGAGCCAGCGGGGAAAAATCTGAGTCTGATGGGGAAAAATCTGTCTGGAAATTAGTTGGCAACCGGAGGG
30863	scaffold_24657	2091	TGCAGGACTAGATTAGCGGGGGAGATGCTACTTAGCGTTAGCTCGTTTTCCTTGACCTAAAGTGATGAAGTAGCATTGGCACAGC
30893	scaffold_2469	28147	TGCAGGACAACATCCAGATGGAGAAGGCTATCTTCAACTTCATGAAACATCTCAGCTTCATGATACGGTCAGAGAAGATGAGCCT
30909	scaffold_246	121338	TGCAGGTGCCTACCTGAATGTTCACCAGACACTGTAGCCCTCTCTTGGTGGTCTATAGACAGGTAGCAGGTGTTACTAAGCAGCT
31109	scaffold_2485	7501	TGCAGGTCCTGTACAGACAGCCCAGAGAGGTTGAGTGCTGGGACTCGTTCACTCAGTGTGCTTTCTCTGTCAATCACCTTCTGCT
31137	scaffold_248	432905	TGCAGGCGTTTGGAAATTGCTCCCAAGAATAAACCAGACTTGTGGAAGTCTGCAATGTTTTTTTCGGAGGTCTTGGCTGATTTCT
31443	scaffold_2509	17832	TGCAGGTGAAGAAGCTGGATGTGGAGGTCCTGGGGTGGTGGGGTTACACGTGGTCTGCGGTTGTGAGGCTGGTTGGACGTACCGC
31452	scaffold_250	125498	TGCAGGTTCTCAAGGACGTTCTCAAAGTAGTTCTCCTCACTAAAGTTCAGCTGCAGAAAGAGACCAGATCATCAGAAACAATCTA
31477	scaffold_250	525110	TGCAGGTGCCTGGCCCGACGCAAGGAGTCGCTAGACCGCGATGAGCCATGTAAAGCCCCCCCGGCCAAACCCTCCCCTAACCAGG
31481	scaffold_250	634777	TGCAGGTTTTCCCCCCGGCAGAATTAAGAGACAACTATCAGCGTCCTGCAGACAGCTCCTCTTTGCCTCTCCTCACCTAACCCAT
31569	scaffold_251	225309	TGCAGGTGCCCGGCCCACCACGAGGAGTCGCTACAACGCGATGAGCAAAGTAAAGCCACTCTGTAGGCAGCATAGTTATAATTCA
31616	scaffold_2521	73	TGCAGGCTCAACCTGACACGACCCTCCAGCGTGACAGTGCCACCAGCCATACTGCTCGTTCCGTGCGGGATTTCCTGCAAGACAG
31902	scaffold_25438	5273	TGCAGGGATTCTGTGGTAGAGCACCATTTTAGGTAACACGCTGTGCCACTGTAGGCTCAATTAGAGTGGAGATGACGACCTCACG
31977	scaffold_254	119495	TGCAGGATAAGTACACGTTAATCTCGGCAGGCATCATCATACCTGTGGGAGTGGTGATGTTCATCATCGGGACTGTGGGCTGCTA
32095	scaffold_25556	1240	TGCAGGAAGGACAGACAGGCCTCTCCAACATAAACAGGCTGGGGGGAGGGAGAGACAGGCAGGACTACTGCTCACTGACCACAGG
32292	scaffold_256	371440	TGCAGGTAAAAAATATCCTGATAAAAATAAATAACCTATGAATCACATTGGCTACGCATGGCGGGCCTGCGACGAACTTGAAACA
32321	scaffold_25704	322	TGCAGGACTACCAGTTTTATCCCCTATAGTCTTGTCTTACTCTATGTCTCAATGTCCAGTCTCACTCTCCATTTGCAGTTACTCT
32354	scaffold_2574	66154	TGCAGGCAGTCACTGAGTTTGAGGTGCTAAAGGGGATCCTTAAACTTAGACCATTTCTTCTTAAGGTTGCTGTCCTTATCATCGC
32421	scaffold_257	480386	TGCAGGAAAGAGAAACAGAAGCAGGTTGACATTAAATTTTAATGTTGAACTTTTGAGACAGTTCCATTCTGCCTGATGGCACTGC
32453	scaffold_257	918449	TGCAGGACATAGGGCCCCAGATAACTAGGGGCCCTATAGTTAACAAACCCATTGATTGATGAGACATAAAAAATACATTCTAAAA
32460	scaffold_25801	1701	TGCAGGACACGAGGGCCAATTGTTTGGGCTGGGGGCTGAGCATTCACATTATTCTGAGGGGGAATTGGTCATCACTCTAAATAGG
32502	scaffold_2585	5041	TGCAGGCTCATCCTGACATGACCCTCCAGCATGACAACGTCACCAGCCATACTGCTTGTTCTGTGTGTGATTTCCTGCAAGACAG
32594	scaffold_258	869494	TGCAGGAGGAGAAATAAGCATGTTAAAAAAAATGGTGTAAATGAATGGTCTTCTTGTCCAAGGAATGAGCCACCCCGCATGGCTG
32726	scaffold_25	1143323	TGCAGGAGGTTGGCTGGAGGCAAACAGAGGAGACTGGGCGGCCATCTTGGATTCCCAGACTCTGACCGGTGCAGCAAAGGGCCCA
32760	scaffold_25	146433	TGCAGGTGGTTGGCTGGAGGCCAACCAGAGGCGACATAGTGGAGGTCAGTGGATGGGACAGCGTCCACAACTCTGGGCTGTGGAT
32871	scaffold_25	611499	TGCAGGAGGCTAACAGAGGAGACTGGGCGGCCATCTTTGATTCCCAGACCCAAGAACTTGGGGGACGACCGAGCAGGCCAGGACC
33476	scaffold_264	287185	TGCAGGAACGCCCTCCTCCAGCATGACATCCTAATGTTTGTGTGACACTTTATAACGTGGGTCAAAAGGGAAATAACAGTATGAC
33510	scaffold_264	998632	TGCAGGTGTGATGTTCAGATGTACCGATTCTGTGGAGGTGTTGTTACACGTGGTCTGCCACTGCAAGGATTATTAGCTGTCCGTC
33564	scaffold_2658	73399	TGCAGGTATCTGACCCGCCACAAGAAGTTGCTAGAGTGCGATGAACCCTGCCCTAAACCAGACAACGCTGGGCCAATTGTGTGCT
33936	scaffold_268	245876	TGCAGGCTCTGAAGGAGTCCTTACAGATGTCCCTGTCGCTGCTGCCTCCTACAGCCCTGGTTGGCCTGATCACCTTCGGACGCAT
34090	scaffold_269	786015	TGCAGGTCCTCGTGGAGCATGGGGGTCACCCTCACTGCATCCAGCATCTGACTCAACAGCTGGCTCTCCAGAGCCTCCGCCTCCA
34221	scaffold_2704	60162	TGCAGGACTATGTATTTTTGTAAGTAACAGCTGGTGCACAATATCTAAGGAAGTCTCGAGCTATTGCTCACCTGAGGTAGAGTAT
34371	scaffold_271	182971	TGCAGGATCATCTGAGACCAGCCACTCAGACAGCTGAGGAAACTGTGGTTTTGCACAACCAAAGATTTTCTGCACAAACTGTCAG
34730	scaffold_274	1012640	TGCAGGAAGTGTACCACATGAGGAAGGAGAATGTCTTCCCTGTAATGCACAGCGTTGAGATTACCTGCAATGACAACAAGCTCAG
34787	scaffold_2751	81214	TGCAGGACTCTGGAAATTAATAATGCCATTCAGAGCAGGGTGCTTTCATTGGTGGCACACAGGTCAGCGGCCAGACCTGATCAAA
34844	scaffold_275	1065600	TGCAGGTGAAGAAGCCGGATGTGGAGGTCTGGCATGGTTACATGTGTTCTGCGGTTGTTAAGCCGGTTGGACCTACTGCAAAATT
34968	scaffold_276	26944	TGCAGGCTGCACCGTCTCAGACTGCTTTCTCCACACAAAGCAGCTGTAGTCAGGATTGGAACTCCTCTGCATGTGTTTGTGCAAA
35183	scaffold_27899	1636	TGCAGGACAGCAACATGGTGCGTGAGAACAAGTTGAGGATTCAAGGACTATACAAGCATGTTATCTTTCCTTGAATCCTCTCCTT
35201	scaffold_278	339789	TGCAGGTAAAGGTAAACTGCCAGATGTATAGTTTTCATGCATCTTCTGCCAGTAAAATACAATTTGCTTTAAGAACTGGATGTTA
35290	scaffold_279	2337	TGCAGGAAACTTTTGTTGGTCCTTTTCCTACAGAAAATAATCCAACTCTTAACACTGATTTGGACTACCTGTTTATTTCAAAGCA
35413	scaffold_27	955084	TGCAGGTAAACATGTTGCTAGAATAGGAGTTGTTACAGGGAGGAAATTGAGGTTGTACACAACAGCAGATACGTACAGCAAGGTA
35538	scaffold_2812	12429	TGCAGGAAAAAGTGTGCGCGTCAGGAAATGAGATGTAGAGGACAGACATTGATAATGAAGCACATCACTTCTTTGGGGGTTCAAA
35637	scaffold_2823	44559	TGCAGGATGTGGATCTGACCCCTCTGGTCACCAAAACACTGGGTAGGAGCAGGAACAGGATTCTCAGTTCATTAATCTGTTTATG
35811	scaffold_283	386768	TGCAGGTGTGATGTTCGGATGTACTGATCCTATGCAGGTGTTGTTACACGTGGTCTGCCGATCAGCTGTCCGTCCGGTCTCTCTG
35917	scaffold_2849	50313	TGCAGGTTCCGCACAATGAAACCAAAATGTGCTGTGAGGTTGACAAATGTACAGCATAGAGTCCCCTGCCCTGACCACCCGTTAA
36184	scaffold_286	396160	TGCAGGACACTAAGATCCAGAAGGACTTTGTCATCCAGGTCATCGTCAACCCGCAGGCCCCCATTAACTAGGTCCCAGATGAAAG
36216	scaffold_2870	24628	TGCAGGAACTCTTTGAGCGGGTGGGGAAGCTGGTCCCGTTTGCTGGATATGTCCAGGTGTCCGTTGACTGTTTTCCTACACAGGT
36347	scaffold_28809	2685	TGCAGGAAGGGACATACCAACTCGATCACACCCCTACAACGAGACATACCAACTCGGTCACACCCCTACAACGAGACATACCAAC
36473	scaffold_2893	48274	TGCAGGCTGGAAAAGGGATGAGAGAAAACTGTATTCAAAGAGAAAACATGATGTTAGTTAATGTCTCCTGAACCTAAAAAAGTGC
36512	scaffold_289	185326	TGCAGGAAGGGCCCTTCTTTCTCTGAATGAAGGTGTGTCCGCTGCTGGGCTCCCCACTGGAGGATGGCGACAGCTCCTCGTTCTC
36569	scaffold_28	1635058	TGCAGGCTCATCCTGACATGACCCTCCGGCATGACAATGCCACCACTCACAGAACGGGCAGTATGGCTGATTTCCTGCAAGACAG
36577	scaffold_28	1755292	TGCAGGCTGATTGCTAGGTTCAACTGTACTTAGTCTGCTCTATAGCCTCGCAGGGTACATACAATGGACCAAATCCAAAAAAGAG
36652	scaffold_28	914374	TGCAGGACCTTTCTTGAAGACCCCAGACAGCACTCAGCCAATGAGCTACAACAGTTGAACTCCTCTAAGTCAGATTCATCAGCTG
36705	scaffold_29098	214	TGCAGGAGATAGCCATTCATTATTACAAACTGTCAATGAAATGTCACCAACATAACTATTACTCTGAGGGAAGGGTAAGTGTTTG
36831	scaffold_291	175306	TGCAGGAAGCCAGTACCCAGGCTGAATGGGGTAAACTTCTGAGCCTGCTGTGCACCAATCTCAGCCACATACAGAGCCCCCGTCT
36973	scaffold_292	982455	TGCAGGACAAATACAGGTGTTTCCCTTCCTCCTTACTAGTTTTCTGGCTTTCTGCACAGCTGAAGGTTTAGGTCAGCTGGCCCAC
37023	scaffold_29341	113	TGCAGGAAGGGTACCACATGAGGGAGGGATTGGTCTTCCCTGTAACGTGCAGCGTTGATATTGCCTGCAATGACAACAAGCTCAG
37041	scaffold_29363	243	TGCAGGAGACTACAGGACCCCACACCAACTAGCTACTTCTTCCACCACATAATTGCAAGGATTCCCTCTCTACACACACGCATGC
37072	scaffold_2939	59422	TGCAGGAGCCCGTGCTACGGGTGGGTGCTGCTATGGTGACCAGTGAGTTGAGATAAGGCGGGGAATACCTACCAAAGACTTATAG
37301	scaffold_295	607862	TGCAGGTCTGCTGCATCGTTTCACATTTCAATCAGCAAAATGATAAGGCATGGGAAACCAGGTTTGATTACCATCCAATCAATGC
37473	scaffold_2972	4338	TGCAGGTTAGTGTTTTACGTCATGAATCTTGTTCTGGAGGCAGCCCTGCAGACTGGGCACTAGATGGCACAGCCCATCTAGCGGA
37619	scaffold_298	586754	TGCAGGTTCATGCTCTACAACATCCATACCTCACACAGGAAGTGGCACAGGTCCTGATCTAGGCACTTGTCCTCTTCGGTCTGGA
37708	scaffold_299	544340	TGCAGGGAGCTGGGAAGGTGGAGGTGTTGGCATACAGCCTGGAGCACCTGGTCCATGGCAGTCCCGAGGCGCTCCAGGCATGAGT
37842	scaffold_2	1299341	TGCAGGCGAGAGACAGATGGATAGAGAGAGAGCATGATTAAGCATTGTTTAAAAAAAAATCTAACTCAGTCGGTCAGTCAATCAT
37906	scaffold_2	2550627	TGCAGGTTTTCAGTCCAACCCTAATTTAGCAGTTCTGATTCAGCTAGTTAAGGTCTTGTTGAGCAGCTAATTAGTAGAATCCAGT
38049	scaffold_3008	1898	TGCAGGCTGTGTAAGGACTATTTGACCAAGAAGGAGAGTGCTGGAGTGCTGCATCAGATGACCTGGCCTCCACAAACCCCAAACC
38149	scaffold_3016	68251	TGCAGGTTATGCTCAGACTCCTACCTATACACCCAACCTCTACCAGACTGGCAGTCCAGGCTATCCCCCAGGTAAGAACACACAC
38217	scaffold_3020	34494	TGCAGGAGTGAGTCACTGCTTTGATGTTTGCAGAGTACGACAGGGTCATTCTGGGAGAGGGACACCATGGAGTTGTCAACCGTGA
38370	scaffold_3038	66483	TGCAGGACAGGAGACAGCAGGTACAGGGACAAGGTCATTATACACACTTTAGGAATCATGTTATCATATCTATTCCCTTTCCACT
38460	scaffold_304	25110	TGCAGGTGATCCATGCCACCATGGAGAGAGCACATTCCTCCCTACATCAACAAGGTTTTGTAAAGCTTGACATTTCACGAGGAAG
38461	scaffold_304	25114	TGCAGGTCAGAACCTATGGCGTGGGCAGTGTCCAAATGAGTGGCCTACAGCGGCAGTTTACCCCCAACATTATGTCTGACTGACC
38852	scaffold_308	898105	TGCAGGAAGTGTACCACGTGAGGGAGGAGGATGTCTTCCCTGTAACGCACAGGGTTAAGATTACCTGCAATGACAACAAGCTCAG
38858	scaffold_308	977611	TGCAGGTAGGCCGGCTGGCCCCTCTTCACCCTCAACCCTAGGTTAGTCTTCACCAGGGAGCTGTGTGACCCTCCAGCCACGACCA
38941	scaffold_309	167829	TGCAGGCAGAGGAGGGTCGTTAGTGATTGGAGTCGCCTGGGATCAGAATATTTAAACTGTCACTAATCCTCTCTTTCTCTTTCTC
39052	scaffold_30	2085593	TGCAGGCTGCTGATGAGCTCTTCTTACAACTCATTGTCATGATCCTCATATTCTGAAAAGTCTTCATCTTTCAAAGTGGAAGACG
39129	scaffold_31085	683	TGCAGGAAGGGTACCACATGAGGGAGGAGGATGTCTTCCCTGTAACGCTCAGTGTTAAGGTTGCCTGCAATGACAACAAGCTCAG
39319	scaffold_31271	2423	TGCAGGTTGGTCACACCGGGAGCTTTCCTCTCATTAAAACTACACATGATCTTCATGCTTGTGCATATATTTAAATACTTATGCC
39377	scaffold_312	746197	TGCAGGTAATGTCTGATCTCCCGCTTTTGTGTCTGGTTCCTTCCAATGTTTCGTCCTAGTACCCTTACCACACTGTACAAATGGC
39464	scaffold_313	383382	TGCAGGACAGGAGGTAACGTTAGCTAACGTTAGTTTCAACAAGCTAAACGTGGCAAATACAACACACCACACAACATAATTGTAA
39704	scaffold_3166	53946	TGCAGGAAGCAGAGTAACCACAAGTTCTTCTCTCTGTGGACACACACCCACACACAATATCAGTCATCAAAGAGTCAGTCATATA
39809	scaffold_3173	64096	TGCAGGTCCCGACAGAGATCATTGCGGCGCGGTCTGCATTTCTCATGCTGCGTGCGGGGACGATCAGACAGACAACTTTGGGATG
39897	scaffold_317	781981	TGCAGGTGAAGAAGCCGGATGTGGAGGTTGTGGACTGGCGTGGTTACATGTGGTTTGCGGTTGTGTGGCCGGTTAGATGTACTGC
40042	scaffold_3199	35897	TGCAGGTGCCCGGCTCGCCACAAGGAGTCAATAAAGCACAATGGGCCAAGTAAAGCCCCCCCCGGCCAAACCCTCCCCAGGCTGT
40091	scaffold_31	1189720	TGCAGGTTGTCTGGGGAAGTGACTGGACTGACTCCGGCCGTCCTGGCCGCCCTGCTAACGGCGTCGGAGAGGGAGAGAAGAGCGC
40175	scaffold_31	868953	TGCAGGATCATGCTCAACAACATCCGTTGAGTACGATCCTACCTCACACAGGAAGTGGCGCAGGTCAAAATGTACGCCTACCACG
40213	scaffold_32052	1649	TGCAGGTCTTGCTTCAGAGACGACCCAGAAGAATGTATTATAAAAGGCAGTGACTCAACCTACACAACCTTTGACCTTGAGAGTG
40230	scaffold_32081	2255	TGCAGGTGCCCGGCCAGCCACAAGGTGTCGCTAGAGCGCGATGATCCAAGTAAAGCCCCACCGGCCACACTGCTCGCGCACCCCA
40292	scaffold_32116	2487	TGCAGGAAAGTGTGTCCCCCTGGAGGGAAGAAAATGTCATTTTGACCCTGCTGGTCATCTATGAATGTTTGAACATCTTGAAGAA
40427	scaffold_3223	16151	TGCAGGATGGATGAATCATCCGTCATGCACACCTTGCCCACAGCCCTCACCCTACCCTAATCTGAGACTGCAGCGGTGGCTGAGC
40482	scaffold_322	545769	TGCAGGTAGGAAATAGCCAGAGAAAATGAAATAAGACTATAAATCACATTGGCGTCATGTGGCAATGCACTAGAAACATTGTATC
40551	scaffold_3234	38079	TGCAGGGAAACGCCTTACTACTGTAGCAATCACAGGGGGTTGGTGGCACCTTAATTGGCGAGGACAGGCTCATAGTAATGGCTGG
40762	scaffold_3257	46760	TGCAGGTAACATCAGAGCACAACATTCTTCGATATTCTCTCATTGGGCACAGTAAACATATTATTTCCGGAGTTATTCTTATGAC
40895	scaffold_326	832340	TGCAGGTGGTACTTCTTCTCCTGAAAGACAGGGACACACATACCAGTGCAGTGTCATAACGCCAGACCTTGGCAAGTGAGGCTGC
41377	scaffold_330	71936	TGCAGGGAGTTGATCTGACATACCAGCTTGGTGTTCCTCAACTGCCTGCTCATGTCTTCCATCAGGGTTTACATCCAAAGCTCTA
41385	scaffold_33116	2708	TGCAGGAAATAAAAAATAATTCATTAGTGCTAAGGTGAAGGGAAGAAATATGAACAGAGCAGGGCTTTATTGGCTGTTACAATCT
41487	scaffold_33216	2609	TGCAGGTTCAGCAGTGTGTGTGGTGATGAGTTGCTGGGCCATGCAGGGAGCGGTTCAGGAGGATACCTCCATCATGTGTTCACAC
41752	scaffold_334	604613	TGCAGGTGAAGAAGCCGGATGTGGAGGTCCTGAGCTGGCGTGGTTACACGTGGTCTGCAGTTGTGAGGCCGTTTGGACATACTGT
41969	scaffold_336	693296	TGCAGGCAGACAGCGGTGTGTCGTTCAGTGACTGAAAATGAGCCCCGGTTTGCCACTGTGTGACACATGAAGGATATCCAACTGT
42017	scaffold_3376	32044	TGCAGGTGAGTGTGTACTGAACCATGGGGCGGATCTTCCTGGACCACATCGGGGGCACACGCCTCTTCTCCTGCGCCAACTGTGA
42151	scaffold_338	11175	TGCAGGAAACACCAGTGCTCTCCCCCCTTCATCTGCATGGATCTCTGGAGGAAACACGAGTGCAGGTACATAAATGGCAGCAGGA
42164	scaffold_338	35391	TGCAGGTGTGTTGGGTCATTGTCCTGTTGACCAACAAATTATAGTCCTACTAAGCGCAAACCAGATGGGATGGTGTATCACTGCA
42250	scaffold_3396	50461	TGCAGGTAGCTGAGTGCAGTAGTACTGGGTAGTTGTGTTTGTAGAAAGAACCATCTCACCACCTCTACCCTGCTTTGCTCTCCTC
42369	scaffold_33	2089661	TGCAGGACAAGGACCTGAAGCAGTACATGGACGACTGTGGGAACATCCTGAGCATGCAGAACGTCAAGGTGAGTGTCTACAGTAC
42619	scaffold_34227	2885	TGCAGGAGAACATCTCAGACTCCCTGGTTATTCCTTTGCCTTCTATGTCCTCAGCGAGGCTCAGGCGCTGGCCTGCCGATGACCC
42810	scaffold_343	788259	TGCAGGATCGTCTGGGACCAGCCACCTGGACAGCTGATGAAAATGAGGAATATTTCTGTCTGTAATAAAGTACTTTTGTGGGGAA
43185	scaffold_3483	51950	TGCAGGCATTTTTTGGTACCCTTCCCCAGATCTGTGCTTCAACACAATCCTGTCTTGGAGCTCTACGGACAATTTCTTCAACCTC
43235	scaffold_348	206825	TGCAGGGCATCTACGCGCTGCAAGGGTCCTCTGCCCCTCATCTCTCCCTCCAGACTGTGGGACAGCTTAAGGTCAGGGTTAATGG
43293	scaffold_3495	63998	TGCAGGTGGCGATCTGTGCAGGGTACATTGCCCTGCAGACAGAGCTGGAGGTGCTGGTGGTCAAACTGGAGAGACTTCCTGGTGC
43385	scaffold_34	1753348	TGCAGGAAGGACTGGTGCACATCATAAAATAGATGGCATCGTGAGAAAGGACAATTATGTGGATATATTTAAGCAACATCTCAAA
43510	scaffold_350	241301	TGCAGGTGTGATGTTCAGCTGTACCGATCCTGTGCAGGTGTTGTTATACGTGGTCTGCCACTGCGAGGGCGATCAACTGTTCTTC
43645	scaffold_3527	28388	TGCAGGCTCATCCTGCAGCATGACAATGCCACCAGCCATACTACTCGTTCTGTGTGTGATTTCCTGCAAGACAGGAATGGCAGTG
43948	scaffold_3554	8276	TGCAGGATCGTCTGAGACCAGCCACCTGGACAGTTGATGAAACTGAGGAGTATTTCTGTCTATAATAAAGCCCTTTTGTGGGTTA
44201	scaffold_357	486695	TGCAGGATGAACCGCCCCTGCACTGCAGAGGGGCCGTGACAATTGGTTGTGTAGCTCGGATTGAAGTGTATTTGCCGTTGTGATG
44203	scaffold_357	496967	TGCAGGCAGACAGTCTCACTCTCACACACAGACACACACAGGTAACTGATCAGTTGTGTGTACGTTTAAATCTTCACTTCCCTCC
44212	scaffold_357	642120	TGCAGGTCGCGGAGTGTGTTGGGTCAGTGCGTAGCGGTCAGCAGCTGCTGCCTAGCCTGCGTTCCACGATTCCCAGGCTAGAGGA
44220	scaffold_357	802924	TGCAGGATTGTCTGACACTAGTCACCCGGACAACTGATGAAACTGAGTTTGCACAACCAAAGAATTCCTGCACAAACTGTCAGAA
44296	scaffold_358	498308	TGCAGGTTTTCCTGACATGACCCTCCAGCATGACAATACCACCACGCACAGAACGAGCAGTATGACTGCAAGACAGGAATGTCAG
44545	scaffold_36093	1369	TGCAGGTTCTAGTTTTATCTTATCTTGATTATTGTCCAGTCATATGGTCAAGTGCTGCAAAGACCTGGTTAAGCTGCAGCTGGCC
44601	scaffold_3611	60207	TGCAGGTAAACACAGCCAAGGAGAAATTACACATCCTTAACTGTTGTAGGATGTACACAATTATTTCATTCAACCCATTATTTGA
44625	scaffold_3617	32803	TGCAGGCTCTAGTTTAGTCTTATCTTGATTATTGTCCAGTCGTGTGGTTCAGTGCTGTAAGGAAATACCTAGTTAAGCTGCCGCT
44707	scaffold_3624	17652	TGCAGGCTGATTCCGAACAGGGCCAGAGGATTGGATTTGTAGATTTAAAGAGATTTCATCCAACAAATATAAAAACAGAAACTAC
44709	scaffold_3624	60614	TGCAGGATGATTATTTCCCTCCTCTCCCAGGTTCTCTCTGTTCGGACTCAGTTCACTGTTGGCCTATTTTGGCTCAAGACGGATG
44750	scaffold_362	382338	TGCAGGAAACGTGACAATTATCCGAACAGAAACTGAAACTGGGAATGGGAAATCAGGTGCCTAGTAAGAAAATTGAAGAGAAAGT
44764	scaffold_362	853836	TGCAGGTGAAGAACCCGGATGTGGAGGTCCTGGGCTAGCGTGTTAATATGGTCTGCGGTTTTGAGGCAGTTGAACATGCTGCCAA
44792	scaffold_36345	2559	TGCAGGTTAACTGTAAGGTGTGGAACCAAGAAAAGAGTGACAGATTCATTGCGAGGCCAGTTTATACTTTGTCTGTAGACATTTA
45036	scaffold_365	275460	TGCAGGTGGATTGGGAAATGTAGGACTTTATGTAGTCAGTCGTGTTTTATGTCAGTTCTTGCAATGCTCAGTTTGGCACATATCA
45042	scaffold_365	401836	TGCAGGTGAAAAGGGTGGAGCTGGGCAATGGGGGTGTGTCCTGCCACCCGGGTCCTTTCCTCCCCTAGGAGGACCAGAGCCTGGT
45334	scaffold_368	670366	TGCAGGTGTGATGTTCAGATGTACCCATCCTATGCAGGTGTTACACATGGTCTACCACTGTGAGGACGATCAGCTGTCTGTCCTG
45460	scaffold_36	1510893	TGCAGGTGAAGAAGCTGGATGTGGTGGTTATGAGCTGGTGTGGTTACATGTGGTCTGCAGTTGTGAGGCCGTCTGGACGCACTGC
45800	scaffold_372	62396	TGCAGGATGCGAGTCACTGCTTTGATGTTGTCCAGGGTCACGCCAAGGTTCTTTGCACTCTGGTAGGGCGACACCATGGAGTTAT
45801	scaffold_372	62400	TGCAGGTTCATGCTGTACAACATCCATAGTGTATGAGCCTATCACACATAGGAAGCGCCGCAAGTCCTTATCCAGGCACTTGTCA
45880	scaffold_373	319507	TGCAGGTGAAAGAAAGCAGTCGTTCTTACTTGGTGGTCCCATCTTTGATGTAGTAGAGTAAGCACTCAGACATCAACGGGTCCTC
45978	scaffold_374	158610	TGCAGGTAGAACATATCCTGACAATAATAAATATACTACAAATCCCAACGTCTGCAATGAACTTGAAACTAGGGATGCACAATAT
45998	scaffold_374	543931	TGCAGGACGCCGAGTCTGAGGGAGCCACGGCTTTCCTGAAGGCTGCGGAGGCCGTCGATGATGTTCCGTTCGGCATCACCTCCAA
46049	scaffold_3757	8564	TGCAGGTACTGCCTCTGCTTGGGCAGCCGCGGGGTCATCAGCGGGCGACCCCGGAAGTTGAACAAGCCCTGGGGAGGAGGCCGTG
46118	scaffold_37670	975	TGCAGGACTGTATTTGCCATATTTGACAAAACGTAGAATTCAACCACTTAAAATATTATTGAATTTATAGCTGTAAACATCAACA
46220	scaffold_377	210512	TGCAGGTTGATGAGGATGAGAGCTTGTACAGTTTGGGCTGCTTGTAACCTGGAATCTGCAGCCAAACCTTGGCTCGTGTCATTAC
46325	scaffold_378	60473	TGCAGGATAGTCTCAGAAGAAGCCATCCGGACAGCTGATGGGTTTGCACAACCAAAGAATTTCTGTACAAACGGTCAGAAACCGT
46334	scaffold_378	766885	TGCAGGCATCAAAGGGGACAGGGTGAGTAATGTCACATAAAACAACATTAGTCGACATTCACAGACACTACATTATGTCAGTGAT
46540	scaffold_37	515148	TGCAGGATATTAAAATTAAATCTGTACTTGCAGCTTGCTTTTGCGCCACTGGAGGGCAAAGTAGCGCCACGGACACTTTGAGAAG
46867	scaffold_38475	998	TGCAGGAACACCCCGTCGTGATCCGTGAAGAAAACAGGCAACAGCCGCCCAGACAACTGACCCAAAGACCTGGATACAAAAATGT
46927	scaffold_384	568572	TGCAGGTAAGGATGCCCTCAGGGGACTGATTTGGGATCAGAGCTTGTCCAAGACAACAACATCTATTGTGGATGTCCATTGCCCA
46931	scaffold_384	662955	TGCAGGAACATCAGCTCAGGTGGTGGAATTGATGGCTTTGACAGAAGCATGCAAACAGGCTAAAGGTGTTATCCATGATTTTGGA
46936	scaffold_384	765517	TGCAGGATACAGATAGCAAGTACAAGCACACAGAACATCCACAGTGTCAGTCTACACAAACAACAGCTAGTCACATACTACTAAA
46942	scaffold_384	851793	TGCAGGAGATTGTATTCCGCTTGCTCGCAATGCTTCACCCCCTTGGGGAACAATACAAAAACACAACCATGCTATAAGTGGAGAC
46945	scaffold_38510	2116	TGCAGGGTGGGAAAAGTATGTGAATCCTTGGATTTAATAACTGGTTAACCCTCCTTTGGCAGCAATAACCTCAACTGAAGTTTTC
46952	scaffold_38516	1285	TGCAGGCGTAACAAAACACAGAGTCTGATTTATTGGAATATTCAAGCCAGGGATGGATATGGTACCAGGCTGCATTGAAGCTCCT
46962	scaffold_3852	29654	TGCAGGTCAGGCTGGAGGTGTTCTCCACCGACACCCAGGAGCTGGAGGCAGCACTGCAAGACCTGGAGGAGGTCAGGGGCCGAGT
47052	scaffold_38608	238	TGCAGGTCCAAACGTGTACGATCTCTTCACTCCTGAAAAAACAAACAGCAATGAATGGAGAGCATTCACTACAGTGTAAACTGGT
47090	scaffold_3869	23815	TGCAGGTACCTACAGGAACTGATTCTAGACCAGGCCTTAGCTTCCAAGCTACACTGTTAACCTGATCCAAGATTTGTACTTAAAC
47165	scaffold_3877	38228	TGCAGGGAGAATTCAGAAAATAAATAAGATGGAAGAAAGATAGTGGTGAAAAAACAGAAACAAACGCCAACAACCAAACAAACCA
47221	scaffold_38801	685	TGCAGGCTCATCCTGACATGACCCTCCAGCATGACATTGCCACCAGCCATACTGTAACGGTTCTCTTCGGGTGAAGTAGAGGCGG
47302	scaffold_3892	52241	TGCAGGTCTGTGGACTGGAAACAAGTGAGCTGAGGTTTTTAGAAAGTATTTTTCATTCTGATTGAGACTTTCTCTGAGTGCCTGT
47372	scaffold_38	1488425	TGCAGGGAGGCGCTATCAGGAATGTGCGGAGGGAAGTGTATGTCATAAACAGAGTAGAAAACAACATTTTAATTGCAGTGGAAAG
47393	scaffold_38	200299	TGCAGGTCAGCAAGTATATCCACAGGTCAAAACTCCCCTTCCTTTTCCATCACAGCCCTAGAATCCAACCTCCTTGACCTCTGTC
47451	scaffold_38	991955	TGCAGGTAGAACCCACACCTACACCCTCCACCCAGTACATAAAGACACTTCTTTGTCTTTTGGCCCTGGAGGTCCCTCTTTAAAG
47479	scaffold_39066	2637	TGCAGGTGACAGCATTCCCTCCCACATGTGCCCCCCTAGGCACAACTATGACAACATAACCAACAAAAACGGTCACAACTCCTGC
47626	scaffold_39232	580	TGCAGGCTTTTCTGCTGATTAGCGGCTGATCTGGGGTCAGGGTTAGCCACCTCTTAATTAAACAGAATAATTTGGTTTCACACTG
47730	scaffold_3935	24191	TGCAGGAGACTGAAAAGATTTGGCATGGGTCCTCAGATCCTCAAAAAGTTCTACAGCTGCACCATCGAAATCATCCTGACTGGTT
47860	scaffold_394	419077	TGCAGGATCGTCTGAAGGGGGAAGGGGTGCTAAGGAGTATTTCTGTATTTAATAAAGCCCTTTTGTGGGGAAAAACGTATTTTGA
47964	scaffold_395	550544	TGCAGGTGTGATGCCAGGACAACTGCTGCTTGTGAGATGGGGACAGGACGCTGCCGATGCCGGGCAGAATTCACGGGAAACAACT
47986	scaffold_3962	47682	TGCAGGTTGTTGATGAGCTGGTTGCTGACAGGCTGGTCCTGGGGCTGGCGGAGGGTCAATCTCATCCTCTTCTTCCAACTCACTG
48470	scaffold_3	1238380	TGCAGGTTCCGGCAGTACACAGCTAGACTCACCATAAGTTCAGGGATGGATGAAGGATCACTTCCTATCGTAGACTCAAAGACAC
48491	scaffold_3	1911123	TGCAGGTTCTGTTCTACCTGATAATTAAATTGCACCCACCTGGTGTCCCCGATCTAAAATCAGTACGTGATCAGAGGGGAAGAAT
48502	scaffold_3	2094025	TGCAGGTAGAAAATATCCGGATAAAAAAAATAAGTATCCTTTAAATCACATTGGCTACGCATGGCCTGTCTGCAAGGAAGCCTTT
48620	scaffold_3	3334756	TGCAGGTGAAGAAGCCGGATGTGGAGGTCCTGGGCTGGCATGGTAACACGTGATCTGCGCTTGGGTCCAGTTGGACATACCGTCC
48672	scaffold_3	624745	TGCAGGATATTGATGTTTCTGAATGGGTTTTGCCAGATCTAACCAGGGATGTGGTGGAGGGTGAATGCCGTTTATACCTTCTTTA
48681	scaffold_40019	1385	TGCAGGTATATCAATAAGTGGAGAGTCTATAATAAAGAAATAAGACAAAGAGAGAGTGTTCTTTGGGGTGTGCCTCAGGGTCACG
48889	scaffold_402	7830	TGCAGGTACGTAGTTGGTGGTGGAGCCCTTCCTTGTCCAATTACACTGAACTTCATTCAACCTGTTTGGTGAGAAGTATTCAACC
48956	scaffold_403	328449	TGCAGGTGAAGAAGCCGGATGTGGAGGTCCTGGGCTGATGTGGTTACACGTGGTCTGCGGTTGCGAGTCCGGTTGGACGCACTGC
48976	scaffold_403	62668	TGCAGGACTGGCAGCAGTACTCCTGGCCTCAGCTGCCCCCAGGTACACACAAAAACCACTCAGCCCACGAAACAGGAAGGAATGT
49232	scaffold_406	434191	TGCAGGTAAGCATTTCGTTGGACAGAGTATACCATGTGTATCCTGTACATACGACTAATAAAACTTGAAACTTCGACACTGAGCA
49331	scaffold_407	361417	TGCAGGTTTTCACTCCAACCCTAATCTAGCACACTTGATTCTAATTATTAGGTGGTTGATATTCTGAACCAGATTAGTTACAACT
49332	scaffold_407	404171	TGCAGGTAGGTAGCTCCCCAGGAACAGGGATGGAGAGCCATGTACTAGTCACTACCCGATTGGCTTTTTGCAACACATGGGCCAA
49468	scaffold_40927	2819	TGCAGGTGAAAAAGCTGGTTGTGGAGGTCCTAGGCTGGCATGGTAACGTGTGGTCTGCGGTTGTGAGGCCGGTTGAATGTACTGC
49517	scaffold_4099	40034	TGCAGGATTCATCTCCTCCTAAGGTCTCCTTGCGGCAATTTAGGACCTTTCTAATCTCATATAGTATTTCAAGATTATAACATGA
49634	scaffold_40	64703	TGCAGGCACATATCTAGGGCCAGCTTAGCCTCTCCCGGTCCGAAACAAAATTCTTGGAATCTACCCCTAGTCCCCTCGCTCCTAC
49655	scaffold_4102	6196	TGCAGGTCAAATCAGAGGCTTCACTTTTGCCCTAAATCTTACAACTGCACAATTTTAACAGTTGTAAAAATCATAGGATCTCAAC
49659	scaffold_4103	3882	TGCAGGAGAGGCCCACGGGAGAGAGCGGGTGAGATGCACAGTAGAGAGCTGGACAGCTGCCACTGTCAGCCCTACTTCACATCAT
49764	scaffold_4114	50395	TGCAGGTCAGTCTGCCATTCAAAGTCAGACAGTCAAACAATCAGTGGGTTGGAGTCAAATTCCAGTTCCAACTGTGCGCAGTCTG
49869	scaffold_412	211917	TGCAGGTGGAGAGCAACTGTGCCAAGACAGAGGTGAAGGAGGTGCTGCAGGCACTTGAGGAGTTGGCCATCAACTACGACCAGAA
49871	scaffold_412	218851	TGCAGGACTCTCTGGGGGGTAACTGTAGGACCACCATGTTCATCTGCTGCTCTCCGTCCAGCTTCAACGACGCTGAGACCAAGTC
50052	scaffold_414	780343	TGCAGGTAAACGCAACTAACGCTTTCCAGTTAACACACTGGTATCACAGCAGTGTTAGACTCAAAACACCTGTCACTCTTTCCCA
50217	scaffold_416	612972	TGCAGGAGCCAATTGGTTGTCCGCTGCGCCGCACCTTCAACACAGAAGAGCCGGCTAAACGCAGCGGGGTGTCTTGTCACGGGAA
50361	scaffold_4196	16491	TGCAGGTAGAAAATATCCTGGCTACACAAGGCCTGTCTGCTGGGAACTTGAAACATTGTATCAACTATTGTATTAACTTGAAGCT
50462	scaffold_41	1419392	TGCAGGCACTTGGCCCTCCGTGGAAGGAGTTTGACACCCCTGCTCTACACATACTCAAGTACTGCAAACCATTAAGAGCTGTCAA
50469	scaffold_41	1502254	TGCAGGTTGTCCCCGGCTGCGTACTACGCGCAGAGAATGATCCAGTACCTGTCGAGGCGGGACAGTATCCGCCAGCGTTCGCTGC
50628	scaffold_42115	2373	TGCAGGTTGTACAGAGTCCCTTCACAGCACATATTCTTGCCACTGTTTGGGTTGTAGGCTATCCCTCCAGATACGTTTTTTGGAT
50715	scaffold_42239	606	TGCAGGAACTCATCTCAAGGCATGATCAGCAGGGTTCTGGTCAGTAGGAACGTGCTTCTGTGTTGGTTGATCTCCTGATATGCTG
50868	scaffold_423	538531	TGCAGGATGAGCAGTGCACCCTCCCCTCACGTTGTGCTCTCCTCAAAGTTTTGGGGCAGCTCTGTGTCTCTGCTTCTCGCCTTTC
50990	scaffold_425	346978	TGCAGGCAGAAGCCAGGCAGGCCAGTGAGAGCACAGGGGCAGAGAGCGAGCCCCCCACAGACCCCCGGGGAGAGATGTCCACCTC
50993	scaffold_425	385578	TGCAGGTCACCAAAACAAAAAGAGATAGCTTTTGGATTAACTTGTTGGTTGGTTGCAGCCTTGTATAAATCCTCTGAACCCTTTT
51113	scaffold_427	298754	TGCAGGTGGGACATGTCCACGTGTCCTTCCATGGACGACGACGTCAGGCCCGACCGACTCATGGCCTTTAAGGAGGAGAAAAATC
51153	scaffold_4285	4008	TGCAGGTTCCCCTCACTGCAGAGGTGAGCGATAAGAGACCTATGTTGCCATCAGGGTTGGAGCCAATTCCATTTAAATTCAGTCA
51225	scaffold_4295	30326	TGCAGGATTTCTCTGATCTAAGGATTTCAGTGCTTTATGTACCACCTGTACTGAGAATGGCAAAAAGCAAAAAGTTTGACCAGCT
51295	scaffold_429	710481	TGCAGGTCCTGGGCTGACATGGTCTGCGGTTTTGAGGCCGGTTGGACATACTGCCAAACTCCCTAGAACGATGTTGGAGGCGGCT
51317	scaffold_42	1053405	TGCAGGAACGCCCCGAATTATGGTCTGCAGTTGCACACTTGAGTGGGCCAGGTTTTAGGTTATATGCACACAAAGGTGAGGCAAT
51344	scaffold_42	1555412	TGCAGGTGAGTCATGCTCTCAGTGGGCTCTCCATCGATGGCCAGGATCTGATCCCCGACACTCAGACTGGCCTGGGCAGCCTTAC
51493	scaffold_430	732076	TGCAGGCAGACAGTACAGACACTCACATCCTCAGAACACAAACACAATTGCCTACATGGTAACACACATTCTGTCCTAAATGCCC
51582	scaffold_431	540231	TGCAGGCGACGTGCAGATGTTTCATTTTTCATGCCGTCATGGCTGAAGCCAACGCAAATTCCTACTATTTATGTGTCCAGGTTAA
51593	scaffold_431	749786	TGCAGGACCAGATTCGCAGCCACCGGTGCCCAAGCCACCACCTCAACAGACACTCCTGCTAGTGTCTCTCCAGGACCAGACATGA
51596	scaffold_431	98866	TGCAGGTATGGCTCTGCCCCTTCACACAGGGCATGGGGAAAAGTCTACTCAGTGGATATCTTGTTCTATTGGCCTGGTCCAGAAT
51620	scaffold_43258	624	TGCAGGATGCAGTCAAGAACACTGCTCTTCATCTGGCCTGCAGTAAGGTGAGCAACCCCACATGAAGAGGATGTTCTCTCTGGTT
51624	scaffold_4326	13738	TGCAGGTACCACGTTCATCTGTACAAACTAAAGTATGCAATACCTTGTGAAGATGCTGGAGGAAACAGGTACAAAAGTATCTATA
51659	scaffold_432	281372	TGCAGGTATACATATACACACTGTTCTACTAGAAATTATATTTTCTATTCAACTCTGCTCTTTCACCATGTCCGTCCATATGTCT
51820	scaffold_434	665960	TGCAGGGTGTTATCCAGTGTTTTCAGAAAGGATTCAGAGACAAACTGCTCAACCTGCAAAAGACAAACAGAACACTCAGAAAGGA
51960	scaffold_43689	1374	TGCAGGTGAAGAAGCCAAATGTGGAGGTCCTGGGCTGTTGTGGTTACACATGGTCTGTGGTTGTAAGGCCGGTTGGACATACTGC
52071	scaffold_437	711185	TGCAGGTAAGCATTTCGTTGGACGGTGTATACCATGCGTATTCTGTACATAATAAAACTATAAACTAACACTCAGACGATCGGGG
52116	scaffold_4389	24217	TGCAGGAGGCAGAATACAATAGAGACCAATGATGATAGCACTATTAAGGTCTCCATCCCTTTCATATACACTTTTAGTATAGGTG
52121	scaffold_438	16851	TGCAGGTTTGGTCCTGGAGAAGACGAAGGCTCCAGCACTGCAGCGACGGACCTCCTGGTTGCATGCGTGGATGTCGATGCGGTAC
52141	scaffold_438	455977	TGCAGGCAACGGGGTAAAAAACAGATCCATGAACAAGGCAGGCTGGAACCTGTGAAAGATGTAAATTCAAAGTAAAAGGAGCCGA
52288	scaffold_43	2163311	TGCAGGAAGTGTACCACATGAGGGAGGAGGATGTCTTCCCTGTAACGCACAGTGTTGAGATTTGCTTGCATTGACAAGTTCAGAT
52343	scaffold_4402	6864	TGCAGGTATGACACACTAGGGGCCATTTTAGATTTTTGGTACTGCAGAACTGTAGGGACATTACCTATGCATTATCGACACAGGT
52519	scaffold_442	209571	TGCAGGTAAATCTCTCTGGTCACCCCAAAACCAATTCTTACTTTGGCCGCCTTGCCTTCCAGTTCTCTGCTGCTGACTGGAACGA
52522	scaffold_442	305768	TGCAGGCGGCTCAAATTCTTACGGTCTTCCTCAGTCTGCACACAAAAAGAAGGGAAGAAATAGTCATATACTGTATATATCTTAC
52546	scaffold_44306	724	TGCAGGTTCATCTCACTGGTCATCCCCAAAGCCAACACCTCTTTTGGCCGCCTTTCCTTCCAGTTCTCAGCTGCCAGTGACTGGA
52576	scaffold_44380	428	TGCAGGATCCACTTCCTGTACACCTTGATCACCTTCCGGGTCGCTGACGTCTCACAGGAGGGCAACAGGAAGGCCTGGAGCAGGA
52815	scaffold_4469	12583	TGCAGGTTGACGGTGAAGATGAGAGAAGAGGCCATGACCACAGCCAGGGACTGGTAGTCTGACGGTGCCTCTCCGTCCTGCCCCA
52869	scaffold_44730	547	TGCAGGATCATCTGCGACCAGCCACCTGGACAGCTGATGAAACTGATTAGTATTTCTGTCTGTAATAAAGCACTTTTGTGGGGAG
52874	scaffold_4473	44847	TGCAGGTTCATTGATCATTTGTGTGAGATTGAGGGCATCAAGCTTAGATTGTATGATAGCCGGGGTGTTAACCTCTAGCGTCGAG
52875	scaffold_4473	44851	TGCAGGTACAACCCCAAATCCGTAAAGACGGGCACCCTCATAGATACCATCCTAACCAACCTGCCCTCCAAATACACCTCTTTTT
53147	scaffold_44	2152456	TGCAGGTAAAGTCCTGCCACAAATCTGTAGAGTTAAAAAAAGTGTTTCACTCCACAATGATACATCAATTGACAGTACAAAACAG
53170	scaffold_44	586425	TGCAGGATTTAGAAGTAAACAGAAATATGTATGTACGTTGAGTTTGAAATGGAAAGTGAAACCATGACCCACACATATAAAAGCA
53176	scaffold_44	679626	TGCAGGATCGCCTGAGAGCAGCCACTTAGACAGCTGAATAAACCAAGTATTTCTGTCTGTAATAAAGCCCATTTGTGTGGAAAAA
53363	scaffold_45235	885	TGCAGGTAACAGACAGGGACAGAAGGAGTTCATTGAACTACAGGGACAGAAGGGTTGTCACCAGGGCCTGACATAACTGGAGGTG
53735	scaffold_4577	29335	TGCAGGACAGGTACAGGATGGAAACAACAACTGACCGAGTTACACCAGGAAAGCACATTCCCTCCATCAGTGCTCAGACTGTACA
53754	scaffold_457	337647	TGCAGGAGTCCTTTTGCCTTTTGCTATGTATATCATGTATATCCCACCTCAAGGAACTTCACTGGACTTAATGCAAACTGGAAAC
53852	scaffold_458	510432	TGCAGGCTAGATTGCTAGCATTAAGTGCACTTCACCATTCATAAAATAACAAAAATACAGGAGTAACAAACAAGTCTGGCCACTA
53885	scaffold_45944	889	TGCAGGTTAGATGTAGGCTTTGCCAAGCATCTGAGCAGTGAGTCTAAGCTACAGTAGCTACAGCGCAACCGGCGACCCTCTGTAA
53959	scaffold_45	1060235	TGCAGGTAGAGGGCAGAGATGCCACAGTGACATCTTTCTTCCAGGTAGCCAGCCACATCCATCTCACTGTGACTCTGCACCAGCC
53998	scaffold_45	18370	TGCAGGTACTATAGAACACCTCTAGCCCTGCACTGATAATACTGCAGTAGTTGTGACATTAGCTTTCTGCTTCAATGAGTAATAA
54013	scaffold_45	217983	TGCAGGGAGGCAATGATCAGGCTCCGGAGCTGTAGGGACATGAGGGCGGCCACGCAGGAGAAGAACTCCTGGGCACTGACTGGGG
54028	scaffold_45	530254	TGCAGGTACAGTCATGGCAAGGTAATGTCAAGAATGATGCACTACCTCATTGGGGGCGATGCTCTTGGTTCGGTCTCTCTTCCCT
54087	scaffold_4608	48600	TGCAGGATTGATCTACCTCCAACACACAAGCCGCCTCCTCCATACACAGAGAGACCCCCAGCCATCCCTCTGGCTGTCCATGCAC
54100	scaffold_460	21086	TGCAGGCTCAACCTGACATGTTCCTCCAGCATGACAATGCCACCAGCCATACTGCTTGTTCTGTGAGTGATTTCCTGCAAGACAG
54118	scaffold_460	395932	TGCAGGTAGGCCCTCACCTTGTGGTGGCGGGCGTTGCTGTCGGTGTCGCTGAAGTCGATCACGCGGCACTCGTATGTGCCCTCGT
54763	scaffold_469	6966	TGCAGGAAGACCAACGTGAGGCTGGGGTGCATCCCGAATGGCACCGTATTTCCTATATAGTGCACTACTTTTGACCTGGGCCCAT
54891	scaffold_47062	2199	TGCAGGACAGGAAGTGGTGTTCAGGTGAATCATGACCTCAGCCTCTCTTATTTCACCAAGCCAGCATTACATACAGGAGACACAC
54919	scaffold_470	669893	TGCAGGACAAACTTCAGGTTCAGGTCCTTCCAGTCAGCCGTGTCGTGGATTAGGTAGGCGTTGACACGCTGCCACGGCTCATCAT
54972	scaffold_471	404593	TGCAGGAAGGAACGACTGTCTCATAAAGCAGTGGTTCATCAACCGTGACGATGATCATCATGCTATATCACTGCTATCATTAACC
55022	scaffold_472	114368	TGCAGGAAGGGTACCACATGAGGGAGGAGGATGTCATTGTACAGTGTTGAGATTCTCTGCAATGACAACAAGCTCAGTCCAATGA
55075	scaffold_47325	736	TGCAGGCACACTTGCATTGGCAGTACAAAGGGAGGTTATGGACAACCCAATATATGACATGTAGCAGACGCTTTTATCAAACCCA
55196	scaffold_474	12763	TGCAGGATGCCCTCTCTGCCCGTCCTGGAGACACGCAGCTCATGCCACTCGTTCATTGTGAGCGTCTCTTCACTCCTGCACATGA
55216	scaffold_474	34903	TGCAGGTAACCATGACATCCACCAATCATCCCTGTTATCTAATCATTAGTGGTACTGAGAATTCCATTTGTGAAGGCTTTGTGCA
55552	scaffold_47906	248	TGCAGGACCCAGTCTGAGCCAGTAGTAAACTCCAGTGGAAGAGCCTCTGCCTGGGCTTTGCGGACCTTGCTTTACCCCCTATCTT
55616	scaffold_47	1017103	TGCAGGTTCTAGCGGAGCTGGGGGCTGAGCTGAAGCGGCACTGTGAGGCAGACATCACCCCTTTCACCCCTAGTGTGGGCGAGCC
55658	scaffold_47	1723359	TGCAGGAAACCCAACGGCCCAAAATAACTCCATCTCTTCTCTCGTTCTTTATCGTCCCAATCTTCCTGCCATAATTTCCCTTGAG
55660	scaffold_47	1871627	TGCAGGATAATATTCAGCACGCCGACCCACCCGTACAGGTATGAACACGTGAGTGTGGGGCCACACAACACCGGCACCCAGGATG
55738	scaffold_4801	19893	TGCAGGCTCTACACAGGTATTACAGATATACAGTACATGGACACCTGCTCGTCAAACATCTTGTTCTAAAATTATGGGCATTAAT
55953	scaffold_4835	35112	TGCAGGTTTGATATGCGCTGAGAAAAACAGTGTACCGTGTAGCCAAACTCCCAGGTACTTGTATGAGGTGACTACCTCCAGGTCT
56028	scaffold_4843	35139	TGCAGGAGAGTTCGGCCATGGCGTACCTGTAGCGGGGCCTCCTCTTTTTCCTTGTCCTCCACTGCCATCAAAGCCACTCTCTTGT
56138	scaffold_485	313248	TGCAGGTGAAGAAGTCGGGTGTGGAGGTCCTGGGCTGGAGTGGTTACACGTGTCCTGCGGTTGTGAGGCCAGTTGGACGTAATGC
56189	scaffold_486	52207	TGCAGGATCCTCTCCAAGTCTTGGTTCTTCTTGTGCATCTGCAGATAGTTGAGCTGAAGCTGATTCTGGTACTTGATGACTCTGT
56356	scaffold_488	604276	TGCAGGACAGGTACAGGATGGCAACAACAACTGCCTGAATAACACCAGGACTGCACAATCTCTCCATCAGTGCTCAGACCATCTG
56385	scaffold_48929	2007	TGCAGGCTCATCCTGACATAACCCTCCAGCATGACAATGGCACCAGCCATACTGCTCGTTCTGTGTGTGATTTCTTGCAAGACAG
56485	scaffold_48	1295475	TGCAGGATGAATGAAGAAGGTCTCTAACCAAATGTCACTATTGGGATTCCACAAATTTCTGTGCTGCTATCCTCCTCTCCTGTGT
56521	scaffold_48	239987	TGCAGGATGTTTGAGAGAACATCATTTGGCCTGATAAGCTGAGCGCCAATAGAGGAGTTTGGACACACTATCATAATGACTAGCG
56528	scaffold_48	406623	TGCAGGTTAGACAAGGAGGAAGTGAGTTTTTCAGGGCAGAATTGCCCCAAGTTGCCTCCCAACACACCACAACAGATTGCCTCAA
56634	scaffold_4910	8950	TGCAGGATTGTCTGAGACCAGTCCCCCGGACAGCTGAGAAATACCCCTCAGTTTCATGTCTGTAATAAAGCCCCTTTGTGTAGGA
56667	scaffold_491	3071	TGCAGGATTAAGATGCTGATTGTCTGCCTGCTGTCCTGACAATGCTGGAGGGAGATGCTGCTCCCAGGAGGTTCTCATGAAGACA
56703	scaffold_49256	2049	TGCAGGGCATCTGCCTTTGTGATTCCAAGCATTTATTCAATCCAATGAAATAGGTTGAGCTTGGCCAGTCTTTCCTTTAAACTCC
56761	scaffold_49345	214	TGCAGGCGTCAGAATTGTCACCCTCTCGACTGGGTCGGAGGGCCGTGTGCGGGAAGAAAAGGAAATCCCGCTTTACACTTCGTTC
56766	scaffold_4935	13162	TGCAGGACACTGGTTGGCACCTCGCAGACATGAGCTAATTGAGCTTTAGGACCTGGTGTGAAGAAGATAAACACGAAGAGTAAAA
56793	scaffold_493	214862	TGCAGGACACACTGTATTCTTTCAAAGTTCTTGCAGGGAAATTGGATGGGGAGTTAGTTGGCTAGCATGGAAAGAGCTCTACATG
56887	scaffold_494	647467	TGCAGGTGTGCACACCAGCTACTGAGAAGCAAAACGAACGGCTCTTTTTGGTAACGTCTTAAACCAAATCACATCTGTGAAAGAG
56973	scaffold_49668	1818	TGCAGGTTAGCGTTCTCCTCTGAGAGTTGCCTGGATGGGGAAGTGAGACAGGGTTATATGTGACCTGTTTCAGGTAACTAGGCAC
57090	scaffold_4980	36413	TGCAGGCAAACGTAAGAGAAGTAGCTCAGAGCGCCACTTTCGTGCATTGCTATACCCACGACTCAATTTAGGTCTGAGTCAGAGC
57124	scaffold_498	271317	TGCAGGACAGTAACTCTCCAGGAACAGGGTTGGAGAGCCCTGTACTAGACAACATACACATGGCCAGTACGTTCATAAAAAGTGC
57133	scaffold_498	526062	TGCAGGTGCATGATTACCTCCGCAGCAAGCTGTGCTCCCTTTATGAGAACGACTGCATCTTCGACAAGTTTGAGTGTGCCTGGAA
57165	scaffold_4995	20903	TGCAGGATAACTCCCACGTACCGTGCTGCTCTCAACGTCGTCTCTCCATTCTGTATGGTGCTCCCTTCTACGCAATCGCCTTTCT
57442	scaffold_4	2919770	TGCAGGATCGTCCGAGACCAGCCACCCGGACAGCTGATGCAACTGTGGGCTTGAACAACCAAAGAATTTCTGCAGAAACTTGACA
57839	scaffold_5047	32213	TGCAGGTAGTATCCCAGCTGTTGGGGGACAGAGAGAGAGGGAGAGGTTATCTATGAATATCCAGCTTCTGGGGGACAGAGGGGTT
57861	scaffold_504	274828	TGCAGGTGTGATGTTCGGATGTGCCGTTTCCAGGTGTTGTACTGTGCAGGTGTTGTTACACGTGGTGTGCCACTGCGAGGATGAT
57961	scaffold_50609	1806	TGCAGGTGACAGCATTCCCTCCCACATATGCCCCACTAGGCACAACTATGACAACATAAACAAAAACGGGTCACAACTCCTGCAG
58364	scaffold_50	913598	TGCAGGCTCCATGGGGCAGTGTCCTACAAGCAGGCAAAAGTGATGGTCTTGGCCCTCTGGATTTGGCCTTCCAGGGGGGCCCGTC
58369	scaffold_5100	39084	TGCAGGGTCTGGATCTTCCTGGAGGGCTGGCTGGGAGGACTGGTCCCCACTATGTTCACCTGGCGCATACGGAACCTACAGGGTA
58370	scaffold_5100	39088	TGCAGGCGCCTCCAGATATCTCCCCCTACAACGTCACCCTCCGAACAGCCTCAGAGACCAGCCTCTGGCTCCGATGGGTGGTGCG
58565	scaffold_512	706982	TGCAGGAATGCGAAATTAGCTTGCCCGATGAACTCGGGATGGCTGGGCAGTGATTCTGGTTCCTCTCCATCGCTCGTTGGGGTTG
58868	scaffold_5177	33355	TGCAGGTAGAACTTGCAGAGGGTGAGGACGCCCAGCGCCACAAAGGACACGGTGAAGACCAGGCCCAGCAGGGAGTAGGGGGTGC
59005	scaffold_518	78595	TGCAGGCTGTCTAGTCATTGCTGGTAATCAAGCCTACTACTGTTGTGTCGTCTGCAAACTTGATGATTGAGTTGGAGGTGTGGCC
59011	scaffold_5190	22235	TGCAGGTAGGAATTATTGGTTGTTTGATTTGTTAATTGATTGGTTGATTAATTTAGATTAATTTGAGCACACTGTAGCTTAGTAA
59022	scaffold_51937	358	TGCAGGTTCATGCTCTACAACATCCGTAGAGTACCACCCTACCTCACACAGGAAGTGACACAGGTCCTAATCCAGGCACTTTTCA
59023	scaffold_5193	18325	TGCAGGAAACACCCATGCTTCAGTAGGCCGCACAGAGCTCCGTACACCAGAACTAGGACATTTTACACTAATGTGTGTGCGTGTG
59457	scaffold_524	178645	TGCAGGATGGTTAATTTTGTGTATTATCCTGGTCAGCGAATTCGACTCTCCTGCCTCATCACCTGGAGTTAACAATGGGATAAAG
59492	scaffold_524	695306	TGCAGGTGCTGAGGATTATTTATGTCTGTAATAAGGCCCTTCTGTGGGGAAAAACAAATTCTGATTGGCTGGGCCTGACTCTCCA
59541	scaffold_525	308460	TGCAGGATGCCGGATCTGATCAACAACTTGATTGTTCCCTCTCCATCTGCGATTCCTCCCAGGAAAAATAACATTAGGTAACCTT
59545	scaffold_525	350888	TGCAGGTCAACATGTACAGCAGCATATTTTTCCTGACATGGATGAGCTTTGACCGCTACGTGGCTCTGGCCAGCTCCATGAGCAG
59546	scaffold_525	350892	TGCAGGAATAAGGACATGAAGGTACACAGAACAGCGTACTCATAGTACTTCTCATTGAGGTTGAAGACCTCGATGAGGGAGTCTG
59789	scaffold_52957	627	TGCAGGTTTCAGTATCGCCTCCGTGGTGTTGACTACACCACTGCGGAAACTATTAATTCATCCTACTTAATCGGACAGCACGGAC
59808	scaffold_529	339939	TGCAGGTGAAGATGTCGGATGTGAAGGTCCTGGGCTGGTTACACAGCGTGGTACTGCGGTTGTGAGGCCGGTTGGACATACTGCC
59904	scaffold_52	75750	TGCAGGTGCACGGCCCACCATAAGGAGTTGATAGAGCGCAATGAGCCATGTAAAGCCCCCCCTGCCAAACTCTCCCCTAACCCGT
59950	scaffold_5308	41268	TGCAGGTCCACTCTCCTGGCCAATCATTCTAATGGGGCTCATCAGATAGGTGAAGGCTGAAGGTGACTGGGAAGAATTACGCTCC
60001	scaffold_53119	898	TGCAGGACTTGTACAGTAGACTACTATTGATTAGAAATGAACAGAGATGACAGATGGAGGGTACTTATAGAACCAGTTTGTAAAC
60119	scaffold_532	480122	TGCAGGTCGATGGTGAATTTTGATTTGGGATGGTTCCTAGGATTCATGGCGGAGCTAGCTGAAAGGCCGTTTCCAAACAGAACCA
60240	scaffold_53508	307	TGCAGGATTTTCTGTACATCAGGGGAAATGTACTTTGCGTGAAATAAAAAGGCTAAGGAGTACGTTTCATGATCAGCAACTTATG
60242	scaffold_53515	2034	TGCAGGATTGTCTGAGACCAGCCACAAGGACAGCTGATGAAACTGGGTTTGCACAAATGAAGAATTTCTACACAAACTGTCTCAG
60259	scaffold_53555	1021	TGCAGGAAATGAAGGGGGCATGTGGTGGAAGGGCACCTACCTGCTCGTCGCTGCGGTGATAATCGTTATCCTCCTCCGGTTTCTC
60327	scaffold_53649	2125	TGCAGGTTCTAAGTTCTAGTGTTCAGTGTTCTGTAAGCGTTCTAACCGTATGGTTCTGGTTCTCCTTCATCTCTCAGAGATCCAG
60571	scaffold_539	562929	TGCAGGATTATGGGGTAGAAAAGCTATAGAAATATTTGACTGAATGACAGCATTGAGTGGCAGCACATCAGTGTATAGTCAATGT
60650	scaffold_53	657898	TGCAGGAGACACACAAGCATATGCATGTAGAGTGATAAGAACAAGAACAACTGTATTATTCGATTAACTAATATTACTCAATAGG
60678	scaffold_5401	2926	TGCAGGATATTAGTATTCATATGCAACCACTGCCCTTTTTCTCCTCCCCTCAGCATCCCGAGGCGGTGTGGAGCCCTGTAGTGTC
60692	scaffold_5407	21297	TGCAGGCAATGTTTCTCAACCCAGTTGTTTTACAGCCTACTTTATTACATACAGCCCAGCTAGCACATATGGTTCCTTTGAAGTT
60712	scaffold_540	297715	TGCAGGATTTTTGCCTTTTTGCTCTTTGGTGCAATAAATAAATAAATAAAAACAATAAACTTAAAGATGTCCTCCGGAGATTATT
60742	scaffold_5415	18558	TGCAGGTACACCACCCTCACCTTAGACCAGCTGGTGGACCTGTCCATTTGGCTGGATAACCTGCTGGCTACCCACGGACGTCCAT
61092	scaffold_5473	40987	TGCAGGCTTTACGTGAAGTGTTACCCAATTATGGTCTGGGCTCAGTGAGAATTGACCAGTGGGCGCAGCTCATCTGAGCTGGTCT
61286	scaffold_54	1503742	TGCAGGTGTGATGTTCGGATGTACCGATCCTGTGCAGGTGTTGTTACACGTGGTCTGCCACTGTAAGAACGATCAGCAGTCTGTC
61313	scaffold_54	2046133	TGCAGGTTCAATAACATGACTCTGATCTCCACGCAAGGCTTCCCGGGCTACTACACCAATGAAAAGATGAGATTCCTGTCCACAA
61382	scaffold_5508	31488	TGCAGGTCTCTGAACATCTCGTCCACAAATGATTGGAAGACTGATGGAGCGTTAATCAACCCATACGGCATGACTAGGTACTCAT
61499	scaffold_55227	1268	TGCAGGTTGGCGGAGAGAGGAACGTTTGCTCTTTAAAGACTAAAAACACAGTTCTTTCTGTTTTAGCCCGTGATGCTGCGCCTAC
61599	scaffold_553	104023	TGCAGGTAAAGCTGGTGAAAGGCCATGGAGTCATAGACATGGTGGTACTGAAATGAACTCAGAGAAAAGACCACCAGACCAGCTT
61618	scaffold_553	363014	TGCAGGTTCATGCTCTACAACATCTGCAGGTTCTAATCCAGGCACTCCTATCCCGTCTGGACTACTGCAACTCGCTGTTGGCTGG
61647	scaffold_55434	654	TGCAGGAATGCGAAATTGACTGCCCCGATGAACTCGGGATGGCTGGGCAGAGATTCTGGTTCCTCTCAATCGCTAGTTAGGGTTG
61824	scaffold_556	484757	TGCAGGAGGACCGGGGACCAGCGGGAGGAGCTGGTACAGGGACCAGTGGAGGCTGATGAGGGGAGGACGGCTCATAATAATGGGT
61829	scaffold_556	583151	TGCAGGTTGGACGAAGCTCCATCTTCCCAGATTCAGACAGCTGTCACAAGCTCACGTTAGAGGCCTTTAAATTCAAGGATTCCAC
61855	scaffold_55721	2229	TGCAGGTACGACTGACACTGGTTCTCATTGCCAGTAAACACAGTTCAGGTTATTCTTCTGTGTCTCAGTGAGAAATGTGACCTGC
61959	scaffold_558	403556	TGCAGGACCCTCTGATGTTACCACACGGTTACACCGGTGGTCACTATGGAGACCAACATCTAATCGAGGCCTGTATATTGCATCT
61966	scaffold_558	637568	TGCAGGAAGGGTACCACATGAGGGAGGAGGATGTCTGGAGGATGGAGGAGGAGGATGTTCCCTGTAACGCACAGCGTTGAGATTG
62127	scaffold_5601	3458	TGCAGGCTCATCCTGACATGCCACCAGCCATACTGCTCGCTCTGTGCATGATTTCCTGAAAGACAGGAATGTCAGTGTTCTGCCA
62230	scaffold_561	218464	TGCAGGTGGCGATCTACTGCAAGGCTTGCCTCGTAACCCTCTCCTCCCGGGAGAGCTTTTTCAAGCACTGTGCCTCATTGGAGCA
62319	scaffold_5632	3583	TGCAGGCTCATCCTGACATGACTCTGCAGCATGACAATGCCACCAGCCATACTGCTTGTTCTGTGCATGATTTCCTGCAAGACAG
62334	scaffold_56358	1844	TGCAGGAAGGGTACCACAGGAGGGAGGAGGATGTTTTCCCTGTCATGCACAGCGTTGAGATTGCCTGCAATGACAAGCCCAGTCC
62338	scaffold_56366	419	TGCAGGGAGTGGAAGGACTCGACTGGCATCTCGAAGAAACCCGATTCCTCTATAGTCGTCAGCTGGTCCAGGATACTGGTGAAGA
62407	scaffold_563	90039	TGCAGGTAAAGAAACCGGTGTGGAGGTCCTGGGCTGGCGTGGTTACACGTGGTTTGCAGTTGTGAGGCCGGTTGGACGTGCCAAA
62520	scaffold_5656	17769	TGCAGGTCGTTCATAGGAAGATGGCCTATATCAGGGTTGACCCTGTAATCAGTGTACAGATGGGGCATCGCCTCACTGTTCCTGG
62659	scaffold_5678	33625	TGCAGGCAGGAATGGGACTTCACTGCCAACATCTGGAGTTGTCAGACCTTTCATGAAAACGTAAAGAAACATACAGGATAAAATA
62693	scaffold_567	681330	TGCAGGTAAATATATTGATAAAAATAAATATCCTATAAATCACATTGGCAACACATGGCCAGTCTGCAATGAACTTGAAACATTG
62754	scaffold_5692	26314	TGCAGGTAGAACATATCCTGATAAAAATAGATATCCTATAAATCACATTGGCTATGCATGGCCTGTCCGCAACAAACTTGAAACA
62916	scaffold_5709	30733	TGCAGGAGTCATATAGAACATAGTAAATACCATGGAAAACACAAAACCATAACCAACGACAAGTCGGGGACATACAAACAGAAAT
62942	scaffold_570	444737	TGCAGGTTAGACAGAGCAGTCACACACCAGTAGTGTTATGAATCCACTCTGCCTCCCAGGCAGCTCATTGTTAAAATGGAGGACC
62999	scaffold_571	458154	TGCAGGTCTTTCAGGACTGGGGTATGGATATGCCCAGATAAAGCAGTATTACAAAAGGTACATTCACTTACAAGTTGAAAACATC
63281	scaffold_5767	32815	TGCAGGTTCTCACTCCAACCCCAGCTGTAACTAACCTGATTCAGCTTATCAACCAGATAATTCAATTCAGGTGTGCTACATTAGG
63319	scaffold_5777	6859	TGCAGGACAGGAGCCAGGAAGATAGAGACTCCATTTAGGACAAACACCAGAATACCCGTCAACCTCTGTTCCCTGTACCACACAG
63332	scaffold_577	120878	TGCAGGATATGGAGGAGAGGATCAGAGAGGCAGGTGGGGCTAATGTGGAAAACAGACTTATGACACCTTGGCAATTATGTCTATT
63376	scaffold_57859	1580	TGCAGGCAATGACAGAAATGCACGGACATCTGCAACCAACAGTTCAGAGAGATTTATACTCTCGGCAGACAAGATCAAGCTTTCG
63462	scaffold_579	179960	TGCAGGTGAAGAAGCTGAATGTGGAAGTCCTGGGCAGGCGTAGTTACACATGGTCTTCCGTTGTGAGGCCGGTTGGACGTATGGT
63631	scaffold_580	585400	TGCAGGATTGTCTGAGACCAGCAACCTGGACAGTTGATGAAACTCAGGAGTATTTATGCCTGTAATAAAGCACTTCTGTGTGAAA
63651	scaffold_5814	5667	TGCAGGATGAGTCTCATGCGGCCAGCGAGCAGGGCAGCAGTGTAGTCAACGTGGAGACGGCCAGGCACCAGGGAGCTCCCCACGA
63786	scaffold_5832	11274	TGCAGGTGGCCTGCGTTGGCCGTCATTCCTGCTGCTACCGCTGCCTGAATCTTACCGATCTCCTCATCTTGTTCTGGGGTTAGAG
63851	scaffold_584	1912	TGCAGGGTCCCTGTTTACAGTTTTGATTTGAGCCATATGGAGCGACTGGCGTCTACACGAGTAAATCACCTCCTCGCCGTCCCGC
63855	scaffold_584	250153	TGCAGGAAGGGTACCTCATGAGTGAGGAGGATGTCTTCCCTGTAACGCGCAACGTTGAGATTGCCTGCAATGACAACAAGCTCAG
63912	scaffold_585	168507	TGCAGGTGAAGAAGCTGGATGTGAAGGTTCTGGGCTGGCTTGGTTACACGTGGTCTACGGTTGCGAGGCCGGTTGGACATATTGC
64457	scaffold_5929	8187	TGCAGGACAGTCAAACTGCAAGCATAGATTATAAACAATCCCACAACTGAAACCAATTGCTGTGTTTTTTCTGTTCAACCTGAAA
64556	scaffold_5943	2219	TGCAGGTTGCCGGCAATCCACCTCAACCCACACAGACACACATGCAGGCGCAATCACGCTTATACACACACTTATCGATGCACTG
64615	scaffold_594	96587	TGCAGGCAGAGCAGGGTCGTTAGTGATTGGAATCACCTGGGCTCAGGTTATTTAAACTGCTTTACTAATCACTCTTGTCTCTCTC
64616	scaffold_594	96591	TGCAGGAGGAAGCGCCCCTGCACTGCAGAGGGGCCGTGACACTACACACAATACCCCATAATGACAAAGCAAAACTGGTGTTTAG
64963	scaffold_59	1073016	TGCAGGTTGGTGAAACACACACTAGACTAGATTCTTCAGTCCCTGTCTCTAGTCTTTTCACCCTGGCTCACCTCTGGATGAAGTG
65046	scaffold_59	731530	TGCAGGAAGGTAGATCTCCAGGAAGAGGGTTGGGCAGCCCTGCTCTAAGTAGATGGAGGATGTGGATGTTTTCTAACAAGAGACA
65058	scaffold_59	841448	TGCAGGCAGAGGGTAGTTAGTGATTGGAGTCACCTGGGCTCTCGCTCTCTCATGAACCTGTTTTGTTTGTTCTTTTGTAGTTTTC
65360	scaffold_6016	4145	TGCAGGTTTTAAAACCACTCCAGCAGCCTTCTTCATCTTCATGTTCACCGTAACCCTGGTGGCCTACACAGCCACCGCCATGACC
65405	scaffold_60225	1399	TGCAGGCTCTAGTTTTAGCTTATTTAGATTTTTTCCCAGTCATATGGTCAAGTGCTGCAAAAAAAGACCTAGTTAAGCTGCAGCT
65513	scaffold_603	392322	TGCAGGTTTTCAGTCCAACCCTAATTTAACACACCTGATTATTCTTATTAGCTGCTCAACAAGGACCTTAACTAGCTGAATCATA
66029	scaffold_610	63701	TGCAGGTTTAACTTATTATTTTCACGATGCTCACTCACAACAGTAAAAACAACAGCAGGCCTACTGGACAACAAAGCTAGGAAAA
66279	scaffold_614	559200	TGCAGGCAACCAGTGCCAGAACGCTAACCACACATTAGCTATCATGGTGGAGGGGTAAGCCGTAGAGCAGATACATGTCCTCACC
66529	scaffold_61850	1747	TGCAGGAGAGCGTGCTATGGGTGGGTGTCTGCTATGGTGACCAGTGAGCTGAGATAAGGCGGGGCTTTACCTAGGAGAGACTTAT
66538	scaffold_61878	471	TGCAGGCGGAGTCAGGAGTTTGGCGAAGACAAAGAGAACTCACTCAGCCCCTCCCTCCTGGGCCGGAGTGGGTAGAGCAGCAGTG
66690	scaffold_61	628955	TGCAGGATCGACTGAGACCAGCCACCCGGACAGTTGATGAAACTGTGGGTTTTCACAATGGAAGAATTTCTGCACAAACTGTCAG
66717	scaffold_62002	616	TGCAGGTAGAAAATCTACTATAAATCACGTTGGCTACACATGTAGCCAATGAACTTGAAACATTGTATAAACTATTAAGTTGGAT
66764	scaffold_620	81877	TGCAGGAATGTCCACCAGAGCTGTTGCCAGAGAATTCAATATGTATTTCTCTACCGTAAGCCACCTCCAAAGCAATTTTAGAGAA
66778	scaffold_62157	1770	TGCAGGAGGAAGGGCAAGAACAGGGTCGCACTGAGAGAGACTCAGGTCAGATACCAGCTGTTGTTGTTGTTTTCACTGTGGTTAT
66793	scaffold_621	212140	TGCAGGTGAAGAATCCGATGTGGAGGCCCTGGGCTTGCATGGCTACACGTGGTCTGCGGTTGTGAGGCCGGTTAGGCATACTGCC
66838	scaffold_6222	2925	TGCAGGATCGTCTGAGACCAGCTACCCGGACAACTGATGAAACTGTGGGATTGCACAACCAAATAATTTCAGCACAAACGGTCAG
66873	scaffold_622	297894	TGCAGGTAAGGGGAGGGAACGTGCTCAACTCTTAGCCTGGTCAAGCAGACTGATCGTTTCACTTCAATTGTCAATTGAAACAGAG
67000	scaffold_624	595652	TGCAGGTATAGTCAGATATCATTTATTCAATGCAGAAGATACAAAATAACTATTTCATATGTAATTCATAGTAATAGACTACATT
67074	scaffold_6260	36411	TGCAGGTAAAGAAACTGGATGTGGAGGTCCTGGGCTGGCGTGGTTACACGTGGTCTGCTGTTGTGAGGCCGGTTGGGCGTACTGC
67094	scaffold_6266	11439	TGCAGGCTTTGAGTAAAGTGTTTCTCCGGGTGAAGTTTCCCACTACGTAAATATGAAGGATCAGCTTCCTCTTCCTCAATCCTAA
67119	scaffold_626	349434	TGCAGGATCGTCTGAGACCAGCCACCAAGACAGCTGATGAAACTGAGGAGTATTTCTATCTGTAATATAGCCTTTTTGGGGGGAA
67124	scaffold_626	520797	TGCAGGACGGTATAGCTCTGTAAGGAGAAAAGGTCGCTCCAATGGCTAGTGTTGTAGGTTAGTCACAGAGGTCCATCACCGGACC
67150	scaffold_62792	1750	TGCAGGTGTAGTAGGATTCAATCTTAGTCCTGTATTGACGCTTTGCCTGTTTGATGGTTAGTCTGAGGGCATAGCGGGATTTCTT
67425	scaffold_63084	2158	TGCAGGACCCTGGAAGATTGAACTAGCATGGGGGCCAGCCACACTGCATCACACATGTGGGTTCAAACAGGATTTGTTTGATTGA
67580	scaffold_632	267073	TGCAGGTAAAACGACCTTGAAACATTGTATCACCTATTTAACTGGGTTCTGCCCAAAGCTTGCACTAGTAAACTTTCAACATTGT
67774	scaffold_635	467885	TGCAGGATCGTCTGACACCAGTCACCCGGACAGCTGATGAAACTGTGGGTTTGCAGAACCGATGAATTTCTGCACAAAATTGTCA
67835	scaffold_636	167867	TGCAGGCTGCTGGTTGCTGATGGGCTGACTGAGGGTCAATCTCATCCTCTTCTTCCAACTCACTGAGACTCTGAATTGACAGAGA
67859	scaffold_63706	2146	TGCAGGAAGGGTACCACATGAGGGAGGAGGATATCTTCCCTGTAACGCACAAACAGCATTGAGATTGCTGGGATTGTGCGTTCCT
67916	scaffold_63837	923	TGCAGGGCCGGGCTGGACCCAGTATGTGCTGATGCACTGCCTGCAGTAACTGTGTCCACAGGGAATGGAGACCGGGTCCCTCAGC
67929	scaffold_63871	1903	TGCAGGAAGGGTACCACATGAGGGAGAAAGATGCCTTCCCTGTAACGCACAACATTGAGATTGCCTGCAATGACAACAAGCTCAG
67944	scaffold_638	323805	TGCAGGTATCAAACTACACTAAATGACCAAAATGTGTCGACACCTGCTTGTCGAACATCTCATTGCAAAATCATTGGCATTAATA
68055	scaffold_63	1760690	TGCAGGACGCAGAGTTCAAACGTTAAGTGTTCGGAAGCTTTATTGTCTGTTCAGGGTAAACACACAGAATTAAATGAAACACTAG
68160	scaffold_640	53710	TGCAGGAAGGGTACCACATGAGGGAGGAGGATGTCTTTGCGATTGCCTGAAATGACAACGAGCTCAGTCTGATGATTTTGTGACA
68430	scaffold_64580	318	TGCAGGTTTAAGTTCTACAACATGTGTAGGGTACGACCTTTCCTCACACAGGAAGCAGTGCAGGTCCTATAATCCAGGCGTGTGT
68467	scaffold_64600	1569	TGCAGGATCTGGAGAGGAGACACAAGACGGAGACCCTCCCAATGCCAGGCCCTCCTCAGGGGTCGAGCCTGAACCGTCCCGGTAC
68470	scaffold_6460	32103	TGCAGGGTGAATAGAAAAAAGACAAATACTAATTGTGTTTCCCCCACAGGGCTCTCTGACTGATTACCTGAAGGCCAACGTGGTG
68537	scaffold_64755	1583	TGCAGGAAAGCACCCACACAACATGATGCTGCCACCCCCTTGGTTCACGGTTGGGATGGTGTTCTTCGGCTTGCCAGCCTCACCC
68692	scaffold_64	1581115	TGCAGGCACGATGTAAAGTAAAGCCCCGCAGCCAAACCCTCCCCTAACCCGGTTGGGACACCGCCTGGGATCAAATCCGGGTCTG
68695	scaffold_64	1616686	TGCAGGTTTTCAATCCAACCCCAGTCGTAACTAACCCGATTCAGCTCATCAACCAGCTAATTATTAGAATTAGGTGCGCTAGATT
68835	scaffold_650	137574	TGCAGGTCAAAGGCCAACGGTCCTCTCAGTTCCTCTACCAGTAACACAACAACAACAACAAAAACACATACGAGCGAGGGCATAC
68914	scaffold_651	567853	TGCAGGTTCATACTCTACCACATTTGTAGAGTAAGACCCGTACCTCACGCAGGTCCTAATCCAGGCACTTGTCATCTACCGTCTG
69046	scaffold_65416	1824	TGCAGGATGGCGTTCCCAGCGGACACCTGCACGGTGACAGTGTTGACGCCTTCCCGGGAGAACGTGCACGCCACGCTCCCTTCCA
69154	scaffold_655	431667	TGCAGGTGATGAGGCCGGATGTGAAGGTCCTGGGCTGGCATGCTTACATGTGGTCTGCAGTTGTGAGGCCGGTTGGATGTACTGC
69213	scaffold_6571	4496	TGCAGGTAATTGCCTTCACACCCAAGACCTGGTTTAACCTCCAGGTTGAAAGACTCAACACCTTTTAGACTGCCGTATAAAACAC
69245	scaffold_657	271942	TGCAGGAGGAGGCAGTGAAAAGATCTTAACTGAAATCCATGACATCTTTCACAAACAAAGACTTTCTTATGCAATTTCGATACAA
69248	scaffold_657	316395	TGCAGGAGGCTCCACTTAGTCTCCAGCATCTTGTTCTGCTGTTCCAGGAAGCGTACCTGTGTGTAGAGAGAGAAATATAATAGTT
69281	scaffold_6584	1101	TGCAGGCTTTGAGAAAAGGCACTGAAAGTTTTAGTTCATGATTAAATGAACATTGTTGTCGTGTGCTGCTACAGACGTCAAGTGT
69426	scaffold_65	891075	TGCAGGTTGTAAAATAGATCGGTCCCAAACCAAACGCAACCGTATCGACATCGGATTGGTAAAACCAATTGACAGATGGAAAGCC
69923	scaffold_66978	1312	TGCAGGATGGTCTGAGACCAGCCACCCAGACAGCTGATGAAACTGTGGGTTTGCACAACCCAAAAATGTCTGCAAACTGTCAAAC
69924	scaffold_66978	1316	TGCAGGTGAAGACTGATTTGGAGGACCTTAGTGTGGTTACACATGGTCTGGGGTTATGAAGCCAGTTGGACGTACTGCCAAATTC
69977	scaffold_669	73671	TGCAGGTGCTGTTGACTGTGTCTGGCCTCCAAGAGTTTCCAGCCTCCCAGCTCCCTGGTCAACATCAGGTCCTCTCCTCTGCATA
69998	scaffold_66	1374158	TGCAGGATGTGATGGTGATGCTCACCTGGGTTCCTGTTTGATGCCTCTGGGGGAACCGGTAGATGTTTCAAAGTCACAGCTACAG
70121	scaffold_67161	201	TGCAGGTAAATGACATGAATGAAAAGTCATTTTGAGGACTATATGTTAATGTTTACTAATCTGTAGTTGTATCTGTCATGTGTGA
70630	scaffold_679	409853	TGCAGGATCGTCTGAAACCAGCCATCCGGACAGCTGATGAAACTGTGACCTGACTGCAGTTGGGTGTCGTAACCGACTTCAGTGG
70662	scaffold_67	1618150	TGCAGGATTGTCTGAGACCAGCCACCCAGACTGCTGATGAAACTATGGGTTTGCACAACAGAAGAATTTCTGTACAAACTCTAAG
70876	scaffold_682	220269	TGCAGGTGGACCCTCAGCTCCTGAAGACCAGCCACGTCCAGGGCTACCCACTGGCTCCTCTTGACCAGGAAGAAGCAGCACAGGA
70912	scaffold_68382	2069	TGCAGGTAATTCTCCAGCCAAAGAATGGCTCGGACATCCAACATGTTGGTGGGCTCTGAGAAACAAACAGACAGACCAACAGTCA
70917	scaffold_6838	1974	TGCAGGTGAAGAACCTGGATGTAGAGGTCCTGTGCTGGCATGGTTACAAGTGGTTTGCAGTTGTGAGGCCATTTGGACATACTGC
70946	scaffold_68461	1480	TGCAGGAAGTAAGCTCAGCAAAACCCAGTAGACAGAGCAGGGAGGGGCCGACACAATCATTACACAGGTGCACCTTGTGCTGGGG
70986	scaffold_68512	1889	TGCAGGTTTGTGACAAATTCTCTGTGAACTGCATAGTGTACCACAAAATATTTGCCAGAAGTTTGCAAATGTTGTTACTAGTGTT
71078	scaffold_686	156811	TGCAGGAGAGTGTTGCTGTGAAGTTAAACTCCTGCTGTGGAAATACATCTTAAAGCCATGCGTGCTCTGCTACTTGGTGCACTTT
71147	scaffold_6875	4003	TGCAGGTGAAGCCGGATGTGGAGGTCCTGGGTTGGTGTGGTTACACGTGGTCTGCGGTTGAGAGGCCGGTTGGACATACTGCCAA
71252	scaffold_68908	441	TGCAGGCTCCTAGCCCGCCACAAGGAGTCATTATAGCGTGATTAGCCAAGTAAAGCCCCCTGTCCAAACCCTCCCCTAACCTGGA
71260	scaffold_6892	5384	TGCAGGAGGAGGCACTCACACAGAACAGCCAGCCAGCATTGGAGACGTGACTCACCCAGCCTTCATGCGACAGTGGCACGTGTCC
71333	scaffold_68	1245653	TGCAGGATTTCGATAATGGAGGTAAGTTAGGACCCTAGAATCACCATGACTGTACTAAAATCATGATAATCACACTAGGCAAAAG
71350	scaffold_68	1559807	TGCAGGTGAAGAAGCCGGATGTGGAGGTCCTGGGCTGGCGTTGTTACACATGGTCTGCGGTTGTGAGGCCAGTTCGTCATGCTGT
71370	scaffold_68	1973180	TGCAGGAATTTGTAGTCTTGCTGAGATTTTCTCTGTTGCTGATTAGCATTTAACATTTTTGAAAGGCTAATTTAATGATAGAACT
71454	scaffold_690	2551	TGCAGGTTGGGGGTCAGTTGACACAGGAGGATGCCAAATGGTTTTTGTCTGGGATAATAGACAGTCTTTTTCACCGCACATTCAC
71545	scaffold_6923	2727	TGCAGGTTAATGCACTCCTGCTGGATTTCTTAAAACACTACTGACAGGAGATGAAATGCACCTGCGAAAACCCCCACAAGGATGA
71631	scaffold_693	227472	TGCAGGTAACTGTTCTGGCCACGCCAATGATTGGGTGATTCGCTGCAGCGGGCGGTGACACATAGGTACATTATTTCAACCAACA
71679	scaffold_6943	17567	TGCAGGTCACAACGGAAGATGTGGTGGAGTGACAAATAACTCCATGCCCATGACTCCAGACACTCAAGCAGCCAAATCCAGTGTT
71723	scaffold_694	88776	TGCAGGTTTGACTCCTGATGAATGCCCCGTCTGCGGAATCTCTCTTGCTCGCTCTCTCAGCAATCAAGTGTCACTGACGCATCCG
71893	scaffold_69841	1658	TGCAGGAGAGTAGACCTCCAGGAACAGGTTAGGCCACCACTGACAAAGAACATCCAGCATTAGAGATTCAGGAGCCATCTGTGTT
72190	scaffold_6	3329841	TGCAGGATTATAGGATGGACCGGTTCCACCTGTTTGGTTCAGGAGCAGTGCCACAAGTCTGCTCTGATGAACTACCCAGGATTAT
72254	scaffold_700	218909	TGCAGGACTTTGGCCGGGCCGAGGAGGTGGACATCATGCTGCAGCGTAGTGAAGGGGGAGTGGACTCTGCTCTGGCCTACGCTAA
72267	scaffold_700	340171	TGCAGGTATCTTTCCGCTACCACTGTCAGCTCTACTCTGAGTGGAGACGAACCAACCAGAAAGTACGCCTGCTCCTTCCAGACGC
72276	scaffold_700	81834	TGCAGGATAGTCAGGGAAAATGCTAACCTTGACACAGGTTGCCATGGCTACTTTTCCAATTAATTTGTTTCCCCTTGTGAGGGAT
72277	scaffold_700	81838	TGCAGGCAGCAAAGTAACTGTGGCAATTGTACTCTGCTGGGGGGATAAAACTGTGTTAAGTGGCTACAGATTTGTGAGAGAATGG
72360	scaffold_7028	13671	TGCAGGTTGGGTGGTCTCCCCAGAGGATAGGGGTGTTCCTGGATTGTGATGAGAGGAAGGTGTCCTTCTATAACGCTGATGACAT
72489	scaffold_704	44258	TGCAGGATCGTCTGAGACCAGCTACCTGGAAACCAAAACATTTCTGCACAAACCGTCAGAAACCGTCTCAGGGAAGCTAATCTGC
73040	scaffold_713	259859	TGCAGGTCATGTTGTGTGGGATGCAGGAGATCGACCTGGCAGACTGGCAGAGGAACACCATCTACAGACACTATGCACGCAGCAG
73290	scaffold_7187	31318	TGCAGGTGGCGTAATAACACCTTGGAGGCCCGCCTGAGGATTTCTCCAGGGATTTTACCTTGCCTGTTGGAGAAAGATCACCGGT
73294	scaffold_718	130784	TGCAGGTATTGGATTATGTTTATGACACCAACATTACTTATCTGATTAGACGTTTACACTGAATTGGCCTTGTTGCAGACCAGGC
73418	scaffold_71	1791888	TGCAGGAGATTTGGAGGGCAGAGCAATGATCAGAGAGCCTGCGACATTAGTGATAACCAACGCCACAAGATCAGACTCAGCCAGT
73507	scaffold_7213	28646	TGCAGGAAGGGGTCCAGCTGCTCCAGGAGCTCTGGGTCACTCTGGACCTTCTCCTCCAAGGATCTGGTCCTGACGTAGAGAGACG
73508	scaffold_7213	28650	TGCAGGTGAGAGCACATTCAGTCAGAATCTAATTAGGGAATTCTACTCTGTGCTGATTACGGCGCATGAGGGCGGCACACAGTGA
73719	scaffold_72564	804	TGCAGGTTAACCAGCTACCCAGGATGAAGTGCATCACTAATGAAAGGTTTTACTCTAGCAGCAGCCAACCTCTGTCCACAGTCAG
73836	scaffold_727	141150	TGCAGGAAAGTCCGGACAAGACGGCAGTCCTGGGACACCTAGTGGTAAACTGAGTACTGTAGGCCAAAAGCCTCTGCCTCAGAAA
73955	scaffold_729	361019	TGCAGGGCTGAGCCACCTACACACAGAACACAGGGTCATGACCAGGAAGTGCTTACTATCCTCATCCTAGAATAGAAGTTATAGA
74066	scaffold_73063	789	TGCAGGAGTTCTACTGTCGCCAGTGCCAGATTTTTGTGTGCTGGCTGTGCACCAGTAACCAGCACAAGGACCATGAGACCACCTC
74115	scaffold_7318	23049	TGCAGGTATGTGTGGTCCAGAGTAGGCAGAGCTACCACTAGACCAAACTTCAAGTAATTCACTGTTTTAACATGATAACTAACCA
74169	scaffold_73245	223	TGCAGGGTCTTACCTGATGGAAACACGCAAAAAGCCAGCTATTTCCTGGAGCAAGTAGGGACACATCAGGTTTCACACAACCCCA
74484	scaffold_738	24078	TGCAGGCTTTATGTGGCCTGTAAACTAGTTTCAAGCCACTGCATTAGGGTAAAACTGGGCACTTAAATGACGGTTTGATAAAATA
74488	scaffold_738	349781	TGCAGGTGAAGAAGCCGGATGAGGAGGTCCTGGGTTGGCATGGTAACACGTGGTTTTGGGGCCGGTTGCTCTGGTGGACATTCCT
74495	scaffold_73954	1980	TGCAGGTGTCCACAAATTACCATCGGATAAACTATGACGTTGAAATGCTCCTTTACTCTGTTCCATCTCACTGCGCAATCCACTT
74535	scaffold_73	1524401	TGCAGGATCTCCGGAGAGATGTAGTCCGGGGTCCCCACGGCAACCGACGACTGGACCTGAGGGAGACCAGGCCCAGGAAATGAAT
74591	scaffold_73	781609	TGCAGGTGGAGCACCCGGATGTTCTTGGGCAGGTTGAGAGGAAACTCATCCAGCTGGTTGCCGTAGAGAAACACCGTCTCCACGG
74723	scaffold_742	59316	TGCAGGGAGCTCAGCCCCTGTGATGTACTGGGCCATCCGCACCATCCTCTGTAGTGCTTCGCGGTCCGGGGTGGCGCATTTGCCA
74773	scaffold_74414	1774	TGCAGGTAGTTGAGCAGCAGAGCCAGGCTTTTCTCATCCAGGGGAGTGTAGGCAAGCATGGAGCCAATTCTCACTGCACAACACA
74854	scaffold_74612	502	TGCAGGAAGACCGGGTAACTTATTTTGCCAACATCTACTTAGCCATATTAAAACGTTACAAATATTTCTGATCACAAGTATCATC
74903	scaffold_746	338455	TGCAGGCTCATCCTGACATGACCCTCCAACATGACAATGGCACCAGCCGTACTGCTCGTTCTGTGCGCGATTTTCTGCAAGACAG
74923	scaffold_746	451029	TGCAGGACATCCTTCACCTCTGTGATGTACGACGCAAAACCCAGGCTTTCAAGTGCTGTGGAGAAGAGGATATGGTTAGGGGAAA
74957	scaffold_747	155014	TGCAGGTACCAGTAGTATCTTGGCGGGAGCGGTGCTGGCAGCTGTCTATAGATGCACGGGGCGAACCTACGACACAGACTCTCTC
74958	scaffold_747	155018	TGCAGGTGCAACAACAAGCAGTGCGAGAGAAAACGGGGAGAAAGATGGAGAAAGAGTGAGAGAGGGGATGTGAGGGGAAGGGGAG
75025	scaffold_748	69914	TGCAGGACCTCTGGTTCCAATAGATCCTGCTGGTCCTGGGCGGCCATCTTCTCCTGCTGGGCCCTTCAGACAGAGGACACAAGCA
75082	scaffold_74	1076610	TGCAGGAGGAAGAGAATGAAAGAAGAGGAAGTCATGAAGCGGCTGGTTTCCTCAAGCCTCCAGTGAATTATACAAACATATCCTA
75084	scaffold_74	1091559	TGCAGGTTTGGCTTAGTGGCTTTGTGTTTGTGAAAATGTGAGAAGCAAACAGTAAAAAGTGAATGATTTAACTCCAGTGTGATTT
75177	scaffold_7505	9399	TGCAGGTGAAGGAGTCTCTCCAAGAAATGGTCATATCACAGTATGTCAAAATGGGCAGCACCATCAAGAGGATCCTCCTGAATTA
75373	scaffold_753	272181	TGCAGGCTCAACAGAACGACAGAATATGGCCACAAGCAGCAGCACATTAAAGGGTCTATTGTAATTGGACTTCAGAGCATCCCCA
75374	scaffold_753	272185	TGCAGGTAAAAATCATTAAACCCTAATCATGACAAAGTGCCACCTGCTTGGGTTAAAGACACACTTTCAGATTACTATTTAATGC
75423	scaffold_754	449269	TGCAGGTTCATGCTGTACCACATCCGTAGACTACGACCTATCCTCAGACAGGAAGCGGCGCAGGTCCTAATCCAGGAATCATGTA
75492	scaffold_75667	509	TGCAGGCAGATGTTTGTCCCCCTGTGGGCTGAGGGTGTCAGGTTCTTGTCTGGTTTTGGCATTTAGGTTGCCACAGACTAGTACA
75530	scaffold_7576	9220	TGCAGGTTGACCTCGGACGTCAGTTGAATGGTGTTTCCTCCTGCACATTGGTGCAGCTGGCTTCCGGTTTAAGCGGGTAGGTGTT
75542	scaffold_757	210716	TGCAGGTTGACTCCGGTCGTCAGACGAAAAGTGTTTCCTTTGAAACATTGGTGCGGCTGGCTTCCAGGTTAAACTTCTTCGGGAT
75630	scaffold_759	130386	TGCAGGTGAAGAACCTGGATGTGGAACTCCTGGGCTGGTGTGGTTACACGTGGTCTGCGGTTGTGAGGCTGATTGTTTTAGAGAA
75952	scaffold_7645	29320	TGCAGGATGCCCTGTGTAAGCAGCTCCGGTGTCTGTGCTACACTCTGCTCCCTTCCTCCTGTATTCTGCTGACTACAGCAGATGA
76064	scaffold_76688	1105	TGCAGGACCTCACCTGTTGTGTTTTGCAGCAGTTTTACATCAGTGTGTCTTGGTTTACTGCAGGATCTGACCATGGAGACGGAGC
76205	scaffold_7686	25524	TGCAGGATCATCTGGGGAGGGGGAGTGCTGAGGAGTATTTCTTTCTGTAAAAAGCCCTTTTGTGGGGAAAAACCTCATTCTGATT
76285	scaffold_769	491323	TGCAGGTAACAAATCATGCTTTCAAGGATTCCACATCCCCTTGACTACCCTTTAAGATGCTCTATGCCCTGGACGTTATATCATC
76312	scaffold_76	1492946	TGCAGGACAGGGACGTGTATCTCACCCCACCATACACAACAGCACACACAAACATTGTACACACACACGCACATACTCATGCACA
76335	scaffold_76	421553	TGCAGGTGAAGAAACCGGATCTGGAGGTCCTGGGCTAGTGTCGTTACACGTGGTCTGTGGTTGTGAGGCCGGTTGGACGTACTGC
76479	scaffold_772	99414	TGCAGGAGACTGTGAAATCGATGTTGATATAGCAGTGTGTGACAACAGAGTGTGTGACAAGTAGCTCTGTGGTGCACATCGCCAC
76496	scaffold_77344	990	TGCAGGAGGACTTTTGCCTTTGGTAGGCGGCCATTGTAAACAAGAATTTGTTCTTAACTGACTTGCATAGTTAAATAAAGGTTCA
76641	scaffold_776	242407	TGCAGGACAAACTGGTCAGGGTCGCTGAGTTTGGCGGAGTCCTGGTCGAAGCGTTGATACTGTTTGACCTCCTGGTCATCGGGGG
76705	scaffold_777	352023	TGCAGGTTGCCATGGAAGCCTTTGGGCAGCTAATAGGCAGACATCTGAGAGACTCCAGGATAGCTGCCAGTTCGGTTGTTCTCTC
77087	scaffold_7840	19946	TGCAGGTGTGATGTTCGTATGTACCGATCCTGTGCAGGTGTTGTTACACGTGGTCTGCCACTGTGAGGACGATCAGCTACTTGTC
77137	scaffold_784	386046	TGCAGGTTCTCACCTTCCTCAGTCCAAACACCATTACCCCCAGTAAGCGAGGAGAAAGGTTTAAATTTAGCAGGCTGGAAAACCT
77142	scaffold_784	431298	TGCAGGAAGGGTACCACGTGAGGGAAGAGGGTGTCTTCCCTGTAACGCACTGCATTGAGATTCCCTGCAATGATGACAAGCTCAG
77147	scaffold_7850	1486	TGCAGGCTCATCCTGACATGACCCTCCAGCATGACAATGTCACCAGCCATATTGCTCGTTCTGTGTGTGATTCCTGCAAGACAGG
77149	scaffold_78515	914	TGCAGGACACAACCACACCACCACATTACCACCACAACATACAACTAATGTTCCCTATAATTGTTTTAGGCTCTGGGCAAATTTC
77176	scaffold_785	274373	TGCAGGTGCCCGACCCGCCACAAGAGGGCGATAGGCCAAGTAAAGTCCCCCCGGCCAAACCCTCCCCTAACCCAAACGACGCTGG
77244	scaffold_7870	694	TGCAGGCCTGTCAGAGGAGGCTGCTGCCACCAGATAAAGCAGAACAATGCCCTTAATAGGCCACAGAGAGACCAAGGATTTCCAG
77473	scaffold_7901	13040	TGCAGGAAGGGTACAACATGAGGGAGGAGTCTTCCCTGTAACGCACAGTGTTGAGATTGCCTGCAATTATAACAAGCTCAGTCCG
77508	scaffold_790	68831	TGCAGGTGTGATGTTTGGATGTACCGATCTTGTGCAGGTGTTGTTACACATGGTCTGCCACTGCCACAGCTGTCCGTCCTGTCTC
77752	scaffold_796	205771	TGCAGGTGAAGATGCTGGATGTGGAGGTCCTGAGCTGCCATGGTTACATGTGGTCTGCAGTTGTGAGGCCTGTCAAATTATCTAA
77809	scaffold_797	385140	TGCAGGAAGTTTGTTTGTTGTGATTGAGTGGGAGGAAACAGCTGAAGGCAAGGTTCTGACAGATCGGTGCGACTTGGTGGTGGCA
77810	scaffold_797	385144	TGCAGGTTGAGTTCAATAACTACAAGCAGATGTATGGGGAAATGCCGGCGGATGCTTTGAATATTCTATTACAAATGGCAGAGAT
77875	scaffold_79928	1182506	TGCAGGTTCATTGCTCTACAACATTTCCTCACACAAGAAGCAGCGCAGGTCCTAATCCAGGCACTTTTCATCTTCCGTCTGGACT
78046	scaffold_79932	332416	TGCAGGTGGACCTGCTCAGCCCCCTCCAGCTCCTGGCGGATCTTCTGCTGGCCGCGCTCGATCTCAATGTGGAGTGTCTCCAACT
78108	scaffold_79934	1841969	TGCAGGTGACAGACTTCTTTGCAGAGAAGATCCTGCAGATCTTTGAGATGATGATCGTGCGCCACGGCTTTATGCTGGTGGGGGA
78138	scaffold_79934	359317	TGCAGGACAATGACCCGAAGCATACTGCTAAAGCAACACTCAAGGTGTTTAATGGGAGACATTTAAATGTCTTGGAATGTCCTAG
78516	scaffold_7	2920443	TGCAGGTACTGTTAAAGAGAAGGAAGAGATGCCCATCTATGATCAATATATCACAATCTGGCTTCATCTGCCTCTCTAATATGCT
78695	scaffold_8039	19978	TGCAGGTAGCTGTTGCTGATCCTCTCATAGCGTTTCAGGGCTGGACGGCTGGTGAAATATCCTGTCCAGAAGTCATGAGCTGAGT
78879	scaffold_808	456325	TGCAGGAACAACATCAACTTCCTGATGGGGTCATGGTGGCCCAACCTGGAGGACCTGTACGAGGCAGATGTCCCCGTCTACCGCT
78984	scaffold_80	370993	TGCAGGATCCTGTAACGGCTGTGTGAGCAAACAAGAGAGGTATCCTGGCCCTCTGGCACCCAGTTGAGAGAAAGGGATTGGGGGA
78998	scaffold_80	638446	TGCAGGTGCTCTCCTCTCAGTGATGAGTAGGACCTAGAGGGAACAGGAAATGATTCATGCTCCTTGTAGTCTGGGTGATTTTAAA
79008	scaffold_80	787637	TGCAGGTGTGATGTTCGGCTGTACCGATCCTGTGCAGGTGTTGGTACACGTGGTCCGCCACTGTGAGGACGATCAGCTGTCCGCC
79087	scaffold_8129	13256	TGCAGGCATGACACTGCCACCAGCCATACTGCTCGTTCTGTGCATGATTTCCTGCAAGACAGGAATGTCAGTGTTCTTCCATGGC
79153	scaffold_814	151069	TGCAGGCTGACTTCGGTCATCAATCAAACAGTGTTTCCTCTGACACATTGGTGCAGCTGGCTTCCGGGTTAAGCGAGTGGGTGTT
79228	scaffold_8167	8632	TGCAGGTATTTTCCCTGTCCGACTGGGTGGTCAAGGGGAACTCAGTCAGTAAAACCGGGCTCTCACATGAGGGGGTCTTCACGTG
79280	scaffold_817	62039	TGCAGGGCCTGGTGCTCTGGGTACCGAGTAATAGTTGTAATAGTACCAGGGGCTGTCCGTTATGAGGCTCTGGCAAGGTTCCCAT
79347	scaffold_819	330368	TGCAGGTAGACACCTGGAAAAAAACCTCACTTCTGAGGGGCATTAGTTGCCAGTTTATGTCAATGCTACAACTGGGCATCCCTTA
79418	scaffold_81	532965	TGCAGGTTGAGTTCAAGTACTGCCAGATGTATGGTGAGATTCATGAGGAAGCTTATAGCCCACAGAGTAATATGAGAAGAATGCA
79443	scaffold_8206	21755	TGCAGGTGCTCCAGCAGCAGATAGTTCTGGTTGAGCACATTCAGCAGGTACTTGCTAGTTTCAAAGTAGGCTGCATCTATCTTCC
79510	scaffold_823	125152	TGCAGGTGAAGAAGCAGGATGTGGAGGTCCTGGAATGGTGAGGTTACACATGGTCTGCGTTTGTGAAGCCAGTTGGACAGCGTAG
79611	scaffold_8270	7002	TGCAGGCAGCTAAGTAGTTCCTGTTGTTTAGCTCGCCACAGCTAAGGCCAATGAAAAGAATGCCGTGACAAGAGCTAAAGCAACG
79711	scaffold_8294	22066	TGCAGGAAGGGTACCACATGAGGGAGAATGTCTTCCCTGTAACACACAGCATTGAGATTGCCTGCAATGACAGCAAGCTCAGTCC
79832	scaffold_830	245368	TGCAGGTGTGATGTTTGGATGTACCGATCCTGTGCAGGTGTTGTTACACGTGGTCTGCCACTGCGACCAGCTGTCCGTCCTGTCT
79894	scaffold_831	97114	TGCAGGAGTGGGACATTCCCTTCGAACAGCTGGACCTGGGAGAGCTCATTGGGAAGGTGAGAGGGCAATAGAACGTGCTGTTTTC
79906	scaffold_8326	26728	TGCAGGAATTCCCCAGAGTGCTGTGCATAGAGGAGAGCCAAGGTCCTTGGAACACAGTGGGCTCTTGTATCTCCTGTCTCTGTCA
80104	scaffold_838	220978	TGCAGGATCGTCTGAGACAGCCACCCGGACAGCTGAGACTGTGGGTTTGCACAACTGAAGAATTTCTGTACAAACTGTCAAACCG
80161	scaffold_83	1261357	TGCAGGAGAAATGTAGATGTAAAACAATTGTGAAATTTAATAGTCTTCTTGCCCAAGGAATGAACCACCCCACATGGCTGCCAAT
80193	scaffold_83	329746	TGCAGGCAGTAAAACGGATTGGCACCACTGTGTGGTAACCCTGGCATTCCGTGGGTTTTGGCGTGTGGCGGTATATGTTGAACAT
80221	scaffold_83	612608	TGCAGGCTGACTTCGGTCGTCAATTGAACGGTGTTTCCTTCAACACATTGGTGCAGCTGGCTTACGGGATTAAACGAGCAGATGT
80242	scaffold_8406	26125	TGCAGGTATGGCATATTTGCTCACAGGTATAATTCATTGGATGAACCCTCCTGCTGACCTGGATGGCATTGTGTGATCCCTCCTC
80394	scaffold_8461	1474	TGCAGGATCTCCAGCACCTTGCGGTCCTTGGCTTCAGCTTTCCATTTCTCTCTGTTGGGGACACAGAGAAACATAGAAATATAAT
80664	scaffold_852	426079	TGCAGGATCATACTCTAAAACATCCTGAGAGTACGACCCTACTGCACACAGGAAGTAGTGCCGGTCCTAATCCAGGCACTTGTCA
80668	scaffold_852	446197	TGCAGGCTCACCCTGACATGACCCTCCAGCCATACTGCTCGTTCTGTGCGTGATTTCCTGCAAGACAGGAATGTCAGTATTATGC
81042	scaffold_861	260115	TGCAGGAACCATTGGGAAGAGTCATCAGATCACAGAGCAGCCAATCAGAGAGCCCACACAGTCTGTACAGGTGGTTTTGAGGAGA
81074	scaffold_862	133427	TGCAGGTCAGAAAGCATGCTCAATAGGCTCCGCAGCAGGCTACGGTCGACGGTCTCGCCGCTGCGCTCCCTCTCGATGAGCAGCA
81121	scaffold_864	183622	TGCAGGTGCCCGGCCCGCCACAAGGAGTCGCTAAAGTGCAATGAGCCAATTAAAGCCCCCCTAGCCAAACCCTCCCCTAACCCGG
81182	scaffold_8662	1187	TGCAGGCCGCCTGTCTGGGCTAATATCCACAAAGTATCTCAACGTTGGAGTGCTACTAGAATAAGATTATATTGACAGGGGGAAC
81194	scaffold_866	105856	TGCAGGATTGTCTGAGATCAGCCACCCGGACAGCTGATGAAACTGAGGCTAAATACACTGTGGAGAAGTTATCAATTATGCTTTG
81213	scaffold_866	388362	TGCAGGATGACTTTGGTCGTCAGTTGTACAGTGAGTCCTCCAGAAAATTGGTGCGGGTGGGTGTTAATTAAGAAGCGCATGTTTC
81317	scaffold_86	1081220	TGCAGGCACATTCTAGAAAGACGTCTTCCCACTGTTCAGATAGCGATGAATGTTTCTCTTCTGTGAGTTCTTACCAATGCCCTGA
81356	scaffold_86	374472	TGCAGGATCATTAATTAGCTGTAATTCATGTGGGCTCCGGATTCCTAACGACGGAATCATTTGTCTACTCAGTTACACCAGGCTC
81544	scaffold_874	47962	TGCAGGTATCTATGGCTTCCACGAAGACACAGTGAATAAGCTGTTCATCCTGAGCATGCCCCTGGCCCATAAGAAGTCCAGCCTG
81634	scaffold_878	265430	TGCAGGAAAGTTATCCTGCAACAGGGTGATCAAATTAAAATCCTCCATCTGGAACTGGATTCCACAGGACCTCCATCTGTCCCCA
81635	scaffold_878	284085	TGCAGGTCAGATTGTATCTGCACTGTACCACTCACACGGTGACGGACGCCCACACACACTGAAGCATGCATCCCATAATTTTTTT
81651	scaffold_8790	19258	TGCAGGAACGCGAAATTGACTGGCCTGATGAACTCGGGATGGCCGGGCAGTGATAGGGGTTCCTCTCCATCACTCGTTGTGTTGA
81814	scaffold_8814	4161	TGCAGGTCATCTTTACACTGAAGTACTGTTGTTCTCTGCCACACTTGAGGGTTTTTGTGAGATCAAAACAATCTGCAATGGTTTA
81823	scaffold_881	213366	TGCAGGCTTGGGAGAAGCCTCGGATCTCTCCGTCATTCCCGCAGAGTACCTAGACCTCCGTGAGGTTTTCAACAAGGCCCCCGCT
81840	scaffold_8826	606	TGCAGGTGCGATGTTCGGATGTACCAATCCTGTGCAGGTGTTGTTACATGTCTGTCACTGCGAGGACAATCAGCCGTTTGTCCTG
81897	scaffold_884	163262	TGCAGGTGAAGCCGGATGTGGAGGTCCTGGGCTGGCGTAGTTCCATGTGGTTGTGAGGCCGGTTGTACATACTGCCAAATTCTCT
82009	scaffold_887	8686	TGCAGGCGTTTGTCTTCATATGCCAATTACCATTGGAATTGCTGTTGCCACGTTGTAAACTTGTGCATGGCTCCACACCCAGCCT
82010	scaffold_887	8690	TGCAGGTTAACTTGTGGAATTAGATTCCACAGAAACAGGATTGTTTGAGGGGGAACAAGAATTGGCACAGATACCATCTCACATG
82097	scaffold_88	1626479	TGCAGGTGTCTGTACGGCTGGCAGGGCGAGTACTGTGATAAGTGCATCCCTCACCCGGGCTGTGTGCATGGAAGCTGCGTGGAAC
82116	scaffold_88	545633	TGCAGGACCTGCTTTGTGTGGTGTCAAAAAAGCAGAGTATCTCTTTGTGACAGACCTCTCCCCATTTTTTTCAACCATTGACTAT
82479	scaffold_89	316069	TGCAGGTTGGCCATACTCAGACTCAGCCGGGATGTGTAGATGAACTCTATGATGTTCTTCAGACCCATCTTGCTCACACCATGGA
82526	scaffold_8	1063727	TGCAGGAAAGTACCCCCACAACATGATGCTGCCACCCCTGTGCTTCACTGTTTGGATGGTGTTCTTCAGCTGGCAAGCATCCCCC
82589	scaffold_8	2285347	TGCAGGTGTGATATTCAGATGTACCGATCCTGTGCAGGTGTTTTTACACATGGTCTGCCACTGCGAGGATGATCAGCTGTCTGTC
82602	scaffold_8	2460511	TGCAGGAACTTTTCACATCATGTTGACTGATGTACATATCTAGGCTACTAAGCTCTACTTCTCCGATGTCAATATTGCCTGGAGT
82713	scaffold_900	252311	TGCAGGCTGCAATGTTTTTATTTGTTGATTTTATGTAGGCTATTTTTACATAGTTGCCAATAGAAGTAACTTTTTGTTTGTATCA
82771	scaffold_902	195100	TGCAGGTCAGACAGCTGGCTAGCGAGAAAGACAGCTGGTTCGACTTATCAATAAGCTCTACCAGAGTGCAGATAACGGTTGAGCA
82822	scaffold_904	165338	TGCAGGTTAAGAAGCTTGATGTGGAGGTCCTGGGCTGGTGTTGTTACACGTGGTCTGCCTCCAAATTCTCTAAAATGACATTGGA
82831	scaffold_904	299718	TGCAGGATTGTCTGAGACCAGCCACCTGGTCAGCTGATGAAACTGTGGGTTTCTGCACAAACTGTCAGAAACCGTCTCAGGGAGC
82880	scaffold_9063	16814	TGCAGGCAGGTATAGATGGCTGAGAATGCCATTTGGAGTCATGACAGCAACTGAAGATTACCAGCACAGACAGTGTGAAGCACTA
82937	scaffold_9088	6162	TGCAGGTCAATATCTCTTAGAATCGCTATAACTAGGACTCAGGGCCCGTATTCACCAATTGTCTGATCTAGGATCAGGTCTAGGA
82944	scaffold_908	33268	TGCAGGTTTTCATTTACACTTGGAATGTCCAATCAAACAGGGCAGCAACCCTCAACCCGTATCCATTAGACCCAGCTTTTATGCA
83143	scaffold_911	236610	TGCAGGCCCAGACATGGATCAAAGCTGGAGAGACATTCAATGACGTCATCTTCACAGTCGAACCAACCGTGGCCCGTGAGCAATG
83207	scaffold_913	249872	TGCAGGTGTTCGTACTGGAGTACCTCAACATGACACCTCAAGCCCTGAATCCCCAAAATGCCCCCTAAATGTTAGGGCTTCCCTG
83232	scaffold_914	232492	TGCAGGAATGGGGGCTGGGAATAAAAATATAGGACAAAACACACATCACTACAAGAGAGACACCACAACACTACATAAAGAGAGA
83248	scaffold_9151	19483	TGCAGGATTCAGTGTAAGCTAAGCCTACAGGTACAATGTTAGCTGGCCTGGTCGGGGAGGGACTTGGTCAGGCCAGCTCATCATT
83466	scaffold_91	368812	TGCAGGCTGCGATGTTTCTGTGTTTGCTTTATGTAGGTTATTTTTAGATTTGTATCATTTAGCTTAACCAAAATGTACAGTGCCT
83517	scaffold_920	167147	TGCAGGTTCAAGGTAAGACAGAGAGAGATGCAAAAGGAGAATTGTCCAAAACTGTCCAATACTAATTGGTACTAACACTTCAAAG
83535	scaffold_9215	11643	TGCAGGTTTATGCTCTACGGCATTGGTAGAGTACGACCCTACCTCACACAGGATAGGGCGTAGGACTTAATCCAGGCATTATCCT
83743	scaffold_927	150531	TGCAGGACCAAAGTATTTTCACCAGCGCCTCAAAATGGTTGAAAAAGTAGTATCTTGGGATGTCGTATAGGCACGGATGACGACG
84007	scaffold_9349	5879	TGCAGGCTTCTCCTTCACTGCAGCCAACGTGAGTAAAACATTTAAACTGGTTAACCCTCGCAAGGCTGCCGGCCCAGACGGCATC
84008	scaffold_9349	5883	TGCAGGTTTTGGTAACCATTGTACAGATTTTAAAATGCACACGTTTAGAGAATATTTCACAGTGAAGATTCTCATATTCTCATGT
84057	scaffold_935	104626	TGCAGGCTAAGCTCCAATTGTTGTCTGTAATGTGGAGATGTAGGGCATTACATTACATTACATGACATTACCTGCCCAGTTAAGA
84080	scaffold_9366	9177	TGCAGGATCATCTGAGGAGGGGTGCTGAGGATTATTTTTGTCTGTAATAAAGTCCTTTTGTGGGGAAAAACTCATTCTGATTGGC
84211	scaffold_93	1228223	TGCAGGACGTGGCACATGGGTTCTTCGGGGGAGCAGGAGAAGATGAGGATGTCATCAATGTAGACAATGTCATCAATGTAGACGA
84212	scaffold_93	1228227	TGCAGGTTCTTCAACGCCTTCTGGAGAATCAGCTGTTTGTGAAGGAGGAGAAGTGCGAGTTCCATTGCTCCACCATCCCCTTTCT
84355	scaffold_942	44420	TGCAGGCTAATCCTGACATGACCCTTCAGCATGACAATGCCACCAGCCATGCGGCTCATTCTGTGCATGATTTCCTGAAGACAGG
84417	scaffold_9450	744	TGCAGGTGCGACACAAAACAAGCTTATTTTGTTGGCACTCCAATATGTCCCATAAACATCACAAATGGTCCTTTTGTTCGATTAA
84422	scaffold_9453	16137	TGCAGGACTGGGCTAGCGTCCGTACCATTCCCGTTGACTACAACCTTCCCACCATCCCCGTTGACTATGAGGGAGGTTAGTTCCC
84470	scaffold_946	221620	TGCAGGCTCATCCTGACATGACCCTCCAGCATGACAATGCCACGAGCCATGCTGCTCATTCTGTGCGTGATTTCCTGCAAGAGAG
84501	scaffold_947	297620	TGCAGGACACACTGGAGGCAGCCAGCTTCCTCCAGATCCTCCCGGTGCTAGACTTCTGCAAGGTCTTTCTCATATCTGGGGTAAG
84828	scaffold_955	278352	TGCAGGACCAATAAGCAAAACATTCAGACAATAATAGGACGACACTGAGACACTCATGAGCAGATCGTGTCTCTGACTTGATGAA
85243	scaffold_9682	13978	TGCAGGCTCTAGTTCGATCTTAGCTTGATTATTGTCCAGTCATATGGTCAGGTGCAACAAAGAAGGACCTAGTTAAGATGCAACT
85358	scaffold_96	294545	TGCAGGTCTCGCAGGTTGACCTTGTTGCTGAGCACGGGGCTGATGTCCTGGATCTTCATGTAGGCCTGGTACGTGTGCTCTTTGG
85371	scaffold_96	797193	TGCAGGATCATCCGAAACCAGCCACCTGGACAGCTGATGAAACTGAGGAGTATTTCTGTCTGTAATAAAGCCCATTTGTGGGGAA
85418	scaffold_971	191986	TGCAGGTGCTGGCTGATCACCTGCGAGATGGTCTGAGACCAGCCACCCGGACAGCTGATGAAACTGAGGAATATTTCTGTCTGTA
85517	scaffold_9743	13548	TGCAGGTGTGATGTTCGGATGTACCGATCCTGTGCAGGTGTTGTTACACGTGGTTTGCCACTGTGAGGACGATCAACTGTCTATC
85606	scaffold_976	189651	TGCAGGACATTTAAAACTTGTTTATTTAAGGTTTTAAAAGGCTTCTAAAGTTAGTAATTTCCATTTTGAAAGTTCAAACTTGATT
85762	scaffold_97	442634	TGCAGGTAGATCGCGTGGCAGAGCTGGTCCAAGTCTGCTGGGTCTGTCATGGCCAGTTCGTACTATCAAGGCACAAGGTGAGAAC
85893	scaffold_9835	15355	TGCAGGACTGCCACCCCCGCTGCAAGGAGCACGGCCAGTGTAAGAACGGACAGTGTGAGTGCCACCCTGGCTGGGAGGGAGAACA
85932	scaffold_984	245156	TGCAGGAAGTTAGACGCCCCCGTGGCCTCAGATACCTTTCTGGTGGCCAGCTTACACAGGCGCTCGATGAAGCCCGGGATGTTTA
86006	scaffold_9873	15432	TGCAGGACGTCCTCCTGCCAAGGTTTGTCTGGGGGGGATGACGTGATCCCCTTTATCCTAGCCAATAAAAGAGAGTGGCCAGTAA
86071	scaffold_989	352880	TGCAGGTGAAGAAGCAGCATGTGGAGGTCCTGGGCTGGTGTGGTCACATATGGTCTGTGTTTGTGAGGCTGGTTGGACGTGCTGA
86174	scaffold_9908	5628	TGCAGGCTGCCGGATCCAAGCTGTGTAATAGCTACCTACAGAATATGAAACCTTACAAGAGATGGTCAGTGGTTGACCTGACTGG
86177	scaffold_990	122190	TGCAGGAGAAGTTGAATGTTTGAAGCAATATGTAAGAATCGCCGCCAGGTGGCAGCTGGAAGCGGTGTTTCTATACAATGCAATA
86233	scaffold_992	271661	TGCAGGTATTTACAACTGTCATAAAACTGTGGGGGTCCTGAGCTCTCTGGAGCAGGTTTCATCAAGAATCTGTCTGTAAGGAGGC
86369	scaffold_9980	17231	TGCAGGTCCTGATGTCGTTTTTGTTGGATTCCCATGTTCTCTTCTATAACAGACAGACATTGGCATTCCAACCGTGTCAGTTACG
86397	scaffold_998	311817	TGCAGGATTGCACATTCAGCAAATCACCAGCAGAGGGAGTCCCCTTTGAATCCATTTCCCCATTCACTGTGTTGATGGTGCTCAT
86504	scaffold_99	253870	TGCAGGAAGTGAACCATCTGGCTGAGCAGGAAGTGCTCTATGTGAGTGGAGCCATCTGAGGTGGTTGGGGACTCTGAGGCTGGGC
86548	scaffold_9	1453481	TGCAGGTAGACAATATCCAGATAAATATAAATATCCTATAAATCACATTGGCTTCACATGGCCTGTCTGCAATGAACTTGAAACA
86596	scaffold_9	2300078	TGCAGGCACTAACACTGGGGAAATAAATAGGCATGCAAAACTGGGGTGACGTATGATGTTGCTACACTACACACCTGTGTGTGTG
86609	scaffold_9	2365975	TGCAGGAGTGTGTCACTGCTTTGATGTTTGCAAAGAACGACAGGGTGTTGTCCAGGGTCACGTCAAGGTTATTTGTACCCTGGGA
86651	scaffold_9	3013403	TGCAGGTGTGATGTTTGGATGTACCGATCCTGTGCAGGTGTTGTTACACGTGGTCTGCCACTGCAAGGATGATCAGCTGCCGTCT
86652	scaffold_9	3013407	TGCAGGACAGGTAAAGGATGGGAACAACAACTGCCCGAGTTACACCGCAACTTTTTTTCATTCAACTTTTTCACTCCGGACGTTT
